REVIEW PAPER

# Ecological imperatives for aquatic CO<sub>2</sub>-concentrating mechanisms

Stephen C. Maberly<sup>1,\*</sup> and Brigitte Gontero<sup>2</sup>

<sup>1</sup> Lake Ecosystems Group, Centre for Ecology & Hydrology, Lancaster Environment Centre, Library Avenue, Bailrigg, Lancaster LA1 4AP, UK

<sup>2</sup> Aix Marseille Univ, CNRS, BIP, UMR 7281, IMM, FR 3479, 31 Chemin J. Aiguier, 13 402 Marseille, Cedex 20, France

\* Correspondence: [scm@ceh.ac.uk](mailto:scm@ceh.ac.uk)

Received 28 January 2017; Editorial decision 22 May 2017; Accepted 23 May 2017

Editor: Howard Griffiths, University of Cambridge

## Abstract

**In aquatic environments, the concentration of inorganic carbon is spatially and temporally variable and CO<sub>2</sub> can be substantially oversaturated or depleted. Depletion of CO<sub>2</sub> plus low rates of diffusion cause inorganic carbon to be more limiting in aquatic than terrestrial environments, and the frequency of species with a CO<sub>2</sub>-concentrating mechanism (CCM), and their contribution to productivity, is correspondingly greater. Aquatic photoautotrophs may have biochemical or biophysical CCMs and exploit CO<sub>2</sub> from the sediment or the atmosphere. Though partly constrained by phylogeny, CCM activity is related to environmental conditions. CCMs are absent or down-regulated when their increased energy costs, lower CO<sub>2</sub> affinity, or altered mineral requirements outweigh their benefits. Aquatic CCMs are most widespread in environments with low CO<sub>2</sub>, high HCO<sub>3</sub><sup>-</sup>, high pH, and high light. Freshwater species are generally less effective at inorganic carbon removal than marine species, but have a greater range of ability to remove carbon, matching the environmental variability in carbon availability. The diversity of CCMs in seagrasses and marine phytoplankton, and detailed mechanistic studies on larger aquatic photoautotrophs are understudied. Strengthening the links between ecology and CCMs will increase our understanding of the mechanisms underlying ecological success and will place mechanistic studies in a clearer ecological context.**

**Key words:** Aquatic CCM, CO<sub>2</sub>, inorganic carbon, macroalgae, macrophytes, photosynthesis, phytoplankton, seagrasses.

## Introduction

Photosynthesis on land contributes ~50% to the total global net primary productivity of ~105 Pg C year<sup>-1</sup> (Field *et al.*, 1998) and is performed by ~300 000 species of terrestrial photoautotrophs (Kreft and Jetz, 2007), almost exclusively within the Plantae. About 275 000 (92%) of the terrestrial species perform C<sub>3</sub> carbon fixation and contribute ~77% of terrestrial productivity (Still *et al.*, 2003). C<sub>3</sub> photosynthesis involves passive diffusion of CO<sub>2</sub> down a concentration gradient that is produced by carbon fixation by the primary carboxylating enzyme, Rubisco. In theory, this is all that is required to fix carbon, but Rubisco's low rates of catalysis,

low affinity for CO<sub>2</sub>, and ability to fix oxygen can lead to photorespiration, and limit rates of net photosynthesis (Laing *et al.*, 1974; Raven and Johnston, 1991; Giordano *et al.*, 2005).

While C<sub>3</sub> plants rely on 'pull down' of CO<sub>2</sub> by Rubisco fixation, some terrestrial plants have a biochemical CO<sub>2</sub>-concentrating mechanism (CCM) that 'pushes in' CO<sub>2</sub> towards Rubisco, increasing the concentration of CO<sub>2</sub> around the active site and minimizing photorespiration. This mechanism involves pre-fixation of carbon by the carboxylating enzyme phosphoenolpyruvate carboxylase (PEPC), that is unaffected by oxygen and produces a four-carbon compound that is decarboxylated

to generate CO<sub>2</sub> around Rubisco. Plants with a CCM based on C<sub>4</sub> carboxylation contribute the remaining 23% of terrestrial productivity. Two related types of C<sub>4</sub>-based CCMs are found in terrestrial plants. In C<sub>4</sub> photosynthesis, there is an intracellular or intercellular spatial separation of C<sub>4</sub> carboxylation and decarboxylation (Voznesenskaya *et al.*, 2001; Sage, 2002), while in crassulacean acid metabolism (CAM) there is a temporal separation of daytime C<sub>4</sub> de-carboxylation and night-time C<sub>4</sub> carboxylation. C<sub>4</sub> photosynthesis evolved independently at least 66 times and is present in ~8100 species (~2.7%) of terrestrial plants (Sage, 2016), while CAM also evolved in multiple lineages, and is found in 16800 species (~6% of terrestrial plants; Silvera *et al.*, 2010). These additional pathways have costs but can also confer ecological benefits. On land, plants with a CCM have an ecological advantage in subtropical, tropical, and arid or saline environments where reduced stomatal conductance decreases water loss but also reduces the internal CO<sub>2</sub> concentration (Osborne and Freckleton, 2009; Sage, 2016).

Aquatic ecosystems contribute the remaining ~50% of global net primary productivity, which, unlike terrestrial productivity, is carried out by a large phylogenetic diversity of organisms. Although marine angiosperms, seagrasses (72 species; Les and Tippery, 2013), and submerged freshwater angiosperms, macrophytes (~6000 species; Cook, 1990), can be very important local 'ecosystem engineers', they cover a low area of the globe and consequently these Plantae contribute relatively little to global productivity (van der Heijden and Kamenos, 2015). Instead, most aquatic primary production is performed by planktonic cyanobacteria and eukaryotic microalgae in the ocean, with a small contribution from eukaryotic macroalgae [1 Pg C year<sup>-1</sup>, 2% of ocean productivity (Field *et al.*, 1998), and ~0.17 Pg C year<sup>-1</sup> contribution to carbon sequestration (Krause-Jensen and Duarte, 2016)]. The global number of photoautotrophic algal species (including cyanobacteria) is poorly constrained but might be in the region of 150000 (Guiry, 2012; Mann and Vanormelingen, 2013). In contrast to terrestrial primary producers, CCMs are widespread in aquatic primary producers, make a major contribution to aquatic primary productivity, and include the biochemical C<sub>4</sub> and CAM CCMs, found in their terrestrial counterparts, and also biophysical CCMs based on active uptake of HCO<sub>3</sub><sup>-</sup>, or CO<sub>2</sub>, or both that are largely absent in land plants.

The aim of this review is to set the ecological context for aquatic CCMs. To do this, we outline the availability of inorganic carbon in water, summarize the strategies that aquatic photoautotrophs use to maximize carbon uptake, quantify the effectiveness (used herein to refer to the ability to exploit the carbon reserves) in CCMs in different types of photoautotroph, examine the costs and benefits of operating a CCM, and describe the ecological conditions where a CCM appears to increase fitness and creates an ecological advantage.

## Availability of inorganic carbon in water

### *Concentration of CO<sub>2</sub> and O<sub>2</sub> at air equilibrium*

The solubilities of CO<sub>2</sub> and O<sub>2</sub> are described by Henry's law and are independent of variables such as pH. At 15 °C and

standard pressure, the concentration of CO<sub>2</sub> in fresh water in equilibrium with an atmosphere containing 400 ppm CO<sub>2</sub> is ~18 mmol m<sup>-3</sup> (Fig. 1A). In sea water with a salinity of 34, and the same temperature, the concentration will be ~20% lower at ~15 mmol m<sup>-3</sup>. Under these conditions, the concentration of oxygen will be 314 mmol m<sup>-3</sup> in fresh water and ~19% lower in sea water at 256 mmol m<sup>-3</sup>. In both fresh water and sea water, the solubility of CO<sub>2</sub> declines with temperature by ~2.3% °C<sup>-1</sup> between 5 °C and 25 °C, while the solubility of O<sub>2</sub> declines by ~1.7% °C<sup>-1</sup> over the same temperature range. Consequently, at equilibrium with the atmosphere, the molar ratio of CO<sub>2</sub> to O<sub>2</sub> declines from ~0.064 at 5 °C to 0.053 at 25 °C in both environments.

### *Rate of diffusion*

A major difference between photosynthesis in water and air is the rate of gas diffusion which for CO<sub>2</sub> in water at 25 °C is  $2 \times 10^{-9} \text{ m}^2 \text{ s}^{-1}$ , ~10000 lower than in air (Raven, 1970; Zeebe, 2011). Since materials have to diffuse through the boundary layer that surrounds all cells, thalli, or leaves in a fluid (Vogel, 1994), the external transport resistance to carbon fixation can be high (Black *et al.*, 1981), particularly for larger objects in areas of low water velocity. Rates of O<sub>2</sub> diffusion in water are similarly lower than in air (Verberk *et al.*, 2011) and, as a result, rates of loss of O<sub>2</sub> out of a photosynthesizing cell or tissue will also be restricted by transport limitation, increasing internal O<sub>2</sub> concentrations and further promoting the tendency for photorespiration (Mass *et al.*, 2010). As a consequence, half-saturation concentrations for CO<sub>2</sub> for photosynthesis in water are frequently substantially above air equilibrium, especially in the larger photoautotrophs. For example, half-saturation constants for CO<sub>2</sub> in freshwater macrophytes without a CCM, are about seven times greater than air equilibrium (Maberly and Madsen, 1998) while C<sub>3</sub> photosynthesis in air is only stimulated by ~30% at elevated CO<sub>2</sub> levels (Lloyd and Farquhar, 1996; Ainsworth and Long, 2005).

### *Forms of inorganic carbon in water*

Unlike air, four forms of inorganic carbon exist in water. When CO<sub>2</sub> dissolves, a small proportion (<0.2%; Stumm and Morgan, 2012) reacts with water producing carbonic acid (H<sub>2</sub>CO<sub>3</sub>), which together with dissolved CO<sub>2</sub> comprises free CO<sub>2</sub>. Carbonic acid can dissociate, forming bicarbonate (HCO<sub>3</sub><sup>-</sup>), and CO<sub>2</sub> can also react with water, or OH<sup>-</sup> at high pH, to form HCO<sub>3</sub><sup>-</sup> directly. Bicarbonate can dissociate further forming carbonate (CO<sub>3</sub><sup>2-</sup>). Free CO<sub>2</sub>, HCO<sub>3</sub><sup>-</sup>, and CO<sub>3</sub><sup>2-</sup> in aggregate comprise the concentration of total dissolved inorganic carbon (C<sub>T</sub>). The equilibrium between the different forms of inorganic carbon is controlled by temperature, ionic strength, and particularly pH. At 15 °C in fresh water with the average global river ion concentration (ionic strength 1.1 mol m<sup>-3</sup>; Meybeck, 2003), the first and second dissociation constants (pK<sub>1</sub>' and pK<sub>2</sub>' representing the pH where the concentrations of CO<sub>2</sub> and HCO<sub>3</sub><sup>-</sup>, and HCO<sub>3</sub><sup>-</sup> and CO<sub>3</sub><sup>2-</sup> are equal) are 6.41 and 10.38, respectively. In sea

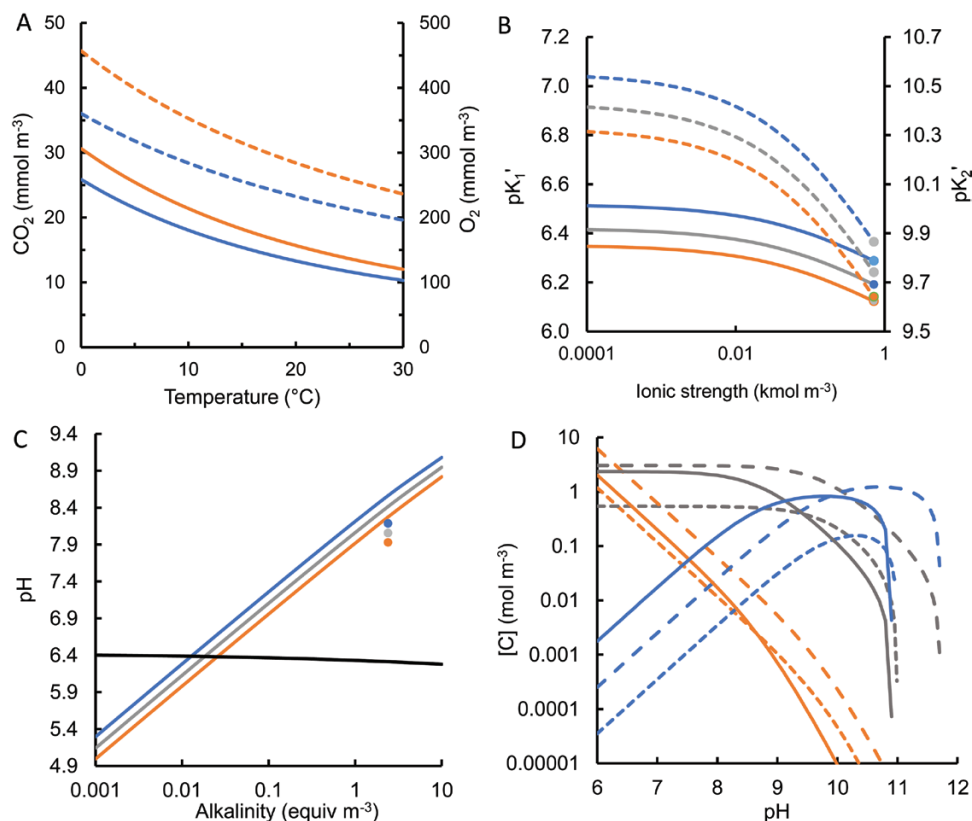

**Fig. 1.** Inorganic carbon chemistry in aquatic systems. (A) Solubility of CO<sub>2</sub> (solid lines) and O<sub>2</sub> (dashed lines) in fresh water (orange) and sea water (blue) as a function of temperature. (B) Effect of ionic strength on pK<sub>1</sub>' (solid lines) and pK<sub>2</sub>' (dashed lines) at 5 °C (blue), 15 °C (grey), and 25 °C (orange); seawater values are shown by circles. (C) pH at equilibrium with water at different alkalinities at 280 ppm (blue) 400 ppm (grey), and 560 ppm (orange); seawater values are shown by circles. The black line shows pK<sub>1</sub>' for fresh water. (D) Bjerrum plot of CO<sub>2</sub> (orange), HCO<sub>3</sub><sup>-</sup> (grey), and CO<sub>3</sub><sup>2-</sup> (blue) for seawater (solid line) and freshwater with alkalinities representing the 25th (dotted line) and 75th percentile (dashed line) in Table 1. More detail is provided in the Supplementary methods.

water at the same temperature, they are 5.95 and 9.11; which is 0.46 and 1.27 pH units lower than fresh water for pK<sub>1</sub>' and pK<sub>2</sub>', respectively (Fig. 1B). As a consequence, CO<sub>3</sub><sup>2-</sup> ions are a larger proportion of C<sub>T</sub> at a given pH in sea water compared with fresh water.

Although under many circumstances the different forms of inorganic carbon can be considered to be in equilibrium, the kinetics of hydration and dehydration between CO<sub>2</sub> and HCO<sub>3</sub><sup>-</sup> are relatively slow and can be exceeded by high rates of CO<sub>2</sub> or HCO<sub>3</sub><sup>-</sup> exchange per unit volume. This can cause the concentration of CO<sub>2</sub> or HCO<sub>3</sub><sup>-</sup> to be pulled out of equilibrium from the concentration set by the physicochemistry. The enzyme carbonic anhydrase acts to maintain chemical equilibrium between CO<sub>2</sub> and HCO<sub>3</sub><sup>-</sup>, and is widely involved in different CCMs (Raven, 1995).

#### Variation in inorganic carbon availability

Alkalinity is the sum of bases formed from weak acids, roughly equivalent to acid-neutralizing capacity, and usually mainly represented by HCO<sub>3</sub><sup>-</sup>. Variable geology leads to a variable alkalinity in fresh waters (Meybeck, 2003). It can exceed 1000 equivalents m<sup>-3</sup> in soda lakes where evaporation, rather than outflow, is the major process of water loss (Talling, 1985). It can also be very low or negative (net acidity) in acid sites affected by acid deposition (Battarbee, 1990),

at peaty sites with a high concentration of organic acids, or at sites in the vicinity of volcanic activity or acid mine drainage where sulphide oxidation generates protons (Evangelou and Zhang, 1995; Pedrozo *et al.*, 2001). Based on the GLORICH database of river chemistry (Hartmann *et al.*, 2014) and site average values for 5303 streams or rivers with a Strahler order of ≥3, alkalinity as a proxy for the concentration of bicarbonate had a median concentration of 1559 mequivalents m<sup>-3</sup> (Table 1). In contrast, the contemporary ocean has a comparatively constant alkalinity of ~2300 mequivalents m<sup>-3</sup>.

At air equilibrium, pH can vary from <2 in highly acid sites, to ~5–8 in lakes with low to moderate alkalinity, to >10 in lakes with very high alkalinity (Fig. 1C) (Talling, 1985). At 15 °C, the air equilibrium pH of sea water is ~8.1 (equilibrium with an atmosphere of 400 ppm) and the concentration of CO<sub>2</sub> represents ~0.7% of the dissolved inorganic carbon, while in fresh water, at a slightly high equilibrium concentration, it can vary between 100% of the inorganic carbon in acid sites, to <0.2% at sites with a high alkalinity (i.e. >10 equivalents m<sup>-3</sup>).

Overlying the variation in pH at equilibrium with the atmosphere, biological production of CO<sub>2</sub> by respiration or removal of CO<sub>2</sub> or HCO<sub>3</sub><sup>-</sup> by photosynthesis can alter C<sub>T</sub> and pH, and consequently the concentration and proportions of the different forms of inorganic carbon. Accordingly, the concentration of CO<sub>2</sub> and the other forms of inorganic carbon can be under- or

oversaturated compared with air equilibrium (Fig. 2). Globally, annual average concentrations of  $\text{CO}_2$  are oversaturated in most lakes and rivers (Cole *et al.*, 1994; Raymond *et al.*, 2013). This results from microbial activity and photodegradation of organic carbon produced on land (Sobek *et al.*, 2007) within the water body and also from lateral transfer of  $\text{CO}_2$ -rich water produced by microbial breakdown of terrestrial organic carbon within the catchment (Maberly *et al.*, 2013). Analyses of large-scale global data sets have shown median values for  $\text{CO}_2$  concentration of  $1598 \mu\text{atm}$  in streams and rivers and  $736 \mu\text{atm}$  in lakes and reservoirs (Table 1) (Raymond *et al.*, 2013). At an assumed mean temperature of  $15^\circ\text{C}$ , this is roughly

**Table 1.** Annual average concentrations of  $\text{CO}_2$  from a global data set of lakes and rivers

$\text{CO}_2$  data derive from Supplementary Information in Raymond *et al.* (2013) and the alkalinity data derive from the GLORICH database (Hartmann *et al.*, 2014).

| Environment                                                | 25th percentile | 50th percentile | 75th percentile |
|------------------------------------------------------------|-----------------|-----------------|-----------------|
| Rivers $\text{CO}_2$ ( $\mu\text{atm}$ )                   | 964             | 1598            | 2311            |
| Lakes $\text{CO}_2$ ( $\mu\text{atm}$ )                    | 340             | 736             | 915             |
| Rivers $\text{CO}_2$ ( $\text{mmol m}^{-3}$ ) <sup>a</sup> | 44              | 73              | 105             |
| Lakes $\text{CO}_2$ ( $\text{mmol m}^{-3}$ ) <sup>a</sup>  | 16              | 34              | 42              |
| Rivers alkalinity ( $\text{mequivalent m}^{-3}$ )          | 540             | 1559            | 3056            |

<sup>a</sup> Calculated from  $\mu\text{atm}$  for an assumed temperature of  $15^\circ\text{C}$ .

equivalent to median  $\text{CO}_2$  concentrations of  $73 \text{ mmol m}^{-3}$  in streams and rivers and  $34 \text{ mmol m}^{-3}$  in lakes and reservoirs. Concentrations of  $\text{CO}_2$  are higher in tropical regions than in temperate or boreal regions (Lauerwald *et al.*, 2015). Given the values of alkalinity for rivers from the GLORICH database noted above and in Table 1, median values of  $\text{CO}_2$  are  $\sim 20$  times lower than median values of  $\text{HCO}_3^-$  in rivers and, assuming similar alkalinity in lakes and rivers,  $\sim 46$  times lower than the median concentration of  $\text{HCO}_3^-$  in lakes. Particularly high concentrations of  $\text{CO}_2$  can also be generated in heterotrophic environments, especially those with restricted access to the atmosphere. For example, respiration can produce  $\text{CO}_2$  concentrations  $>2000 \text{ mmol m}^{-3}$  at depth in a lake (Casper *et al.*, 2000), between  $300 \text{ mmol m}^{-3}$  and  $5000 \text{ mmol m}^{-3}$  in aquatic sediments (Madsen *et al.*, 2002),  $>400 \text{ mmol m}^{-3}$  in groundwaters (Demars and Tremolieres, 2009; Stets *et al.*, 2009; Maberly *et al.*, 2015), and for Swedish and Finnish lakes under ice, median values of  $160\text{--}340 \text{ mmol m}^{-3}$  and maximum values of  $580\text{--}870 \text{ mmol m}^{-3}$  (Denfeld *et al.*, 2016).

Although lakes, and especially rivers, tend to be oversaturated with  $\text{CO}_2$  at an annual scale, during periods of high photosynthetic demand the concentration of  $\text{CO}_2$  can become depleted below air equilibrium in many aquatic systems. Even lakes which are oversaturated with  $\text{CO}_2$  on an annual scale can experience substantial depletion in  $\text{CO}_2$  during productive periods (Maberly, 1996; Fig. 2) and the same can be true in rivers (Jarvie *et al.*, 2017). The least variable aquatic systems in terms of  $\text{CO}_2$  are those of low productivity such as the open ocean where pH is fairly constant at  $\sim 8\text{--}8.1$  (Hofmann *et al.*, 2011)

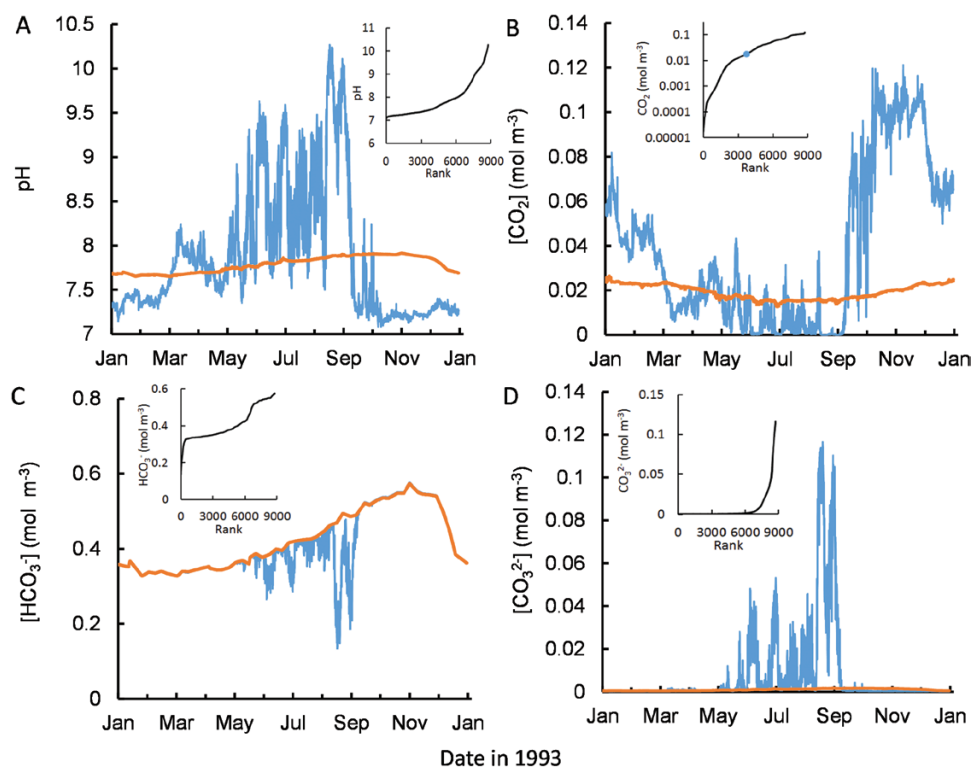

**Fig. 2.** Seasonal changes in carbonate chemistry in a productive lake, Esthwaite Water, UK, during 1993. (A) pH; (B) concentration of  $\text{CO}_2$ ; (C) concentration of  $\text{HCO}_3^-$ ; and (D) concentration of  $\text{CO}_3^{2-}$ . Hourly values are shown (blue line) in comparison with values calculated for equilibrium with an atmosphere containing 360 ppm  $\text{CO}_2$  (orange line). The insets show the ranked values; note  $[\text{CO}_2]$  is on a log scale, with the mean air equilibrium concentration shown by a circle. More detail is provided in the Supplementary methods.

and the CO<sub>2</sub> concentration is always close to air equilibrium. However, at decadal scales, as atmospheric CO<sub>2</sub> has increased, the air equilibrium concentration of CO<sub>2</sub> has also increased and ocean pH has decreased (Doney *et al.*, 2009). In the coastal ocean, with higher productivity and in dense beds of macroalgae with high demand, pH can become elevated and the CO<sub>2</sub> concentration depleted below air equilibrium (Delille *et al.*, 2000; Middelboe and Hansen, 2007; Hofmann *et al.*, 2011; Cornwall *et al.*, 2013; Krause-Jensen *et al.*, 2016). There can also be substantial daily and semi-diurnal changes in CO<sub>2</sub> concentration over 24 h and extreme depletion in sites with extremely high biomass such as rockpools (Maberly, 1992). In productive lakes, large summer populations of phytoplankton, especially cyanobacteria (e.g. Talling, 1976; Maberly, 1996; Ibelings and Maberly, 1998), or dense macrophyte beds (Van *et al.*, 1976) can reduce photic-zone concentrations of CO<sub>2</sub> close to zero for extended periods in the summer when demand outstrips supply (Maberly, 1996; Fig. 2). Under these circumstances, a CCM is essential for continued photosynthesis, especially since high concentrations of oxygen (up to 4-fold air equilibrium; Van *et al.*, 1976) normally co-occur with carbon depletion. Furthermore, under extreme carbon depletion, even HCO<sub>3</sub><sup>-</sup>, the uptake of which is a widespread aquatic CCM, can start to become depleted (Fig. 2C).

An example calculation illustrates the potential mismatch between rates of transport of CO<sub>2</sub> across the air–water interface and the rates of biological transformation of inorganic into organic carbon. Using the data and calculations for 1993 in a productive UK lake, Esthwaite Water (Maberly, 1996), and assuming a subsurface boundary layer thickness of 300 µm, an atmospheric CO<sub>2</sub> partial pressure of 360 ppm, and allowing for chemical enhancement, the maximum rate of CO<sub>2</sub> influx across the air–water interface is 0.8 µmol m<sup>-2</sup> s<sup>-1</sup> and the average summer values are ~0.2 µmol m<sup>-2</sup> s<sup>-1</sup>. If one assumes a surface mixed layer thickness of 5 m, a Chl *a* concentration of 40 mg m<sup>-3</sup> (the summer mean for 1993 in Esthwaite Water), and an average rate of photosynthesis of 100 µmol mg<sup>-1</sup> Chl *a* h<sup>-1</sup>, the demand for carbon per unit surface area in the upper mixed layer will be ~5.6 µmol m<sup>-2</sup> s<sup>-1</sup>, which is nearly 30 times the average rate of CO<sub>2</sub> influx and about 7 times the maximum rate of CO<sub>2</sub> influx. In these types of systems, as a consequence, the concentration of CO<sub>2</sub> can routinely vary 10-fold in 24 h, driven by the light–dark cycle.

## Biochemical, biophysical, and morphological responses to CO<sub>2</sub> availability

Aquatic photoautotrophs respond to variable and often limiting supplies of CO<sub>2</sub> and HCO<sub>3</sub><sup>-</sup> in ways that involve Rubisco characteristics, biochemical pathways, physiological processes, and morphological and anatomical changes.

### *Relationship between Rubisco kinetics and presence of a CCM*

The form of Rubisco and its kinetic properties differ among photoautotrophs and can be seen, in part, as an adaptation

to CO<sub>2</sub> availability. Many forms of Rubisco exist as a consequence of the diverse evolutionary origin of oxygenic photoautotrophs (see table 1 and fig. 3 in Tabita *et al.*, 2008). The Forms IA (α-cyanobacteria), IB [β-cyanobacteria, glaucophytes, green algae, euglenophytes (Zahonova *et al.*, 2016), chlorarachniophytes, and embryophytes], and ID (red algae, cryptophytes, haptophytes, and heterokonts) are hexadecamers made up of eight large and eight small subunits, while the Form II of dinophyceae (and anoxygenic photosynthetic bacteria) (Morse *et al.*, 1995) are either dimers or multimers of the large subunit, although dinophytes with tertiary endosymbiosis may also contain chloroplasts with Form IB and ID (Tamura *et al.*, 2005; Minge *et al.*, 2010). The ID isoform, present in the ecologically important coccolithophores and diatoms within the heterokonts, differs substantially in amino acid sequence from the well-studied IB isoform (Clement *et al.*, 2017b).

The structural types of Rubisco do not match their kinetic properties, however. The average Rubisco specificity factor,  $\tau$ , defined as  $V_c K_o / V_o K_c$  (where  $V_c$  and  $V_o$  are the maximal velocities of carboxylation and oxygenation, respectively, and  $K_c$  and  $K_o$  the Michaelis constants for CO<sub>2</sub> and O<sub>2</sub>), represents the propensity to catalyse the carboxylation versus the oxygenation reactions that lead to photorespiration. Although C<sub>3</sub> and C<sub>4</sub> land plants, diatoms, and coccolithophores have different forms of Rubisco, the specificity factor is similar at ~80–90, while those from cyanobacteria and dinoflagellates are lower and those from red algae twice as high (Tortell, 2000; Young *et al.*, 2016). Conversely, although diatoms and red algae have Form ID Rubisco, their specificity factors are very different (Tortell, 2000). Within C<sub>3</sub> land plants, the Rubisco specificity factor is higher in species in environments where water supply is limited, which is consistent with lower internal concentration of CO<sub>2</sub> in relation to stomatal closure (Galmes *et al.*, 2005). The  $K_c$  for Rubisco is also variable, with average values of ~31 mmol m<sup>-3</sup> in green algae (three species), 16 and 13 mmol m<sup>-3</sup> in bryophytes and ferns (two species each), ~10 mmol m<sup>-3</sup> in C<sub>3</sub> land plants (23 species) and red algae (five species), and 47 mmol m<sup>-3</sup> in diatoms (10 species) (Young *et al.*, 2016; their SI and table 1). Thus these values bracket typical air equilibrium CO<sub>2</sub> concentrations (at 25 °C, ~11 mmol m<sup>-3</sup> and 14 mmol m<sup>-3</sup> in sea and fresh water, respectively; Fig. 1), reinforcing the benefit of a CCM for species that have a Rubisco with a poor affinity for CO<sub>2</sub>. In cyanobacteria, for which a CCM has been shown in all studied photoautotrophic species, Rubisco has an even lower affinity for CO<sub>2</sub> which is often >200 mmol m<sup>-3</sup> (Moroney and Somanchi, 1999) and as high as 750 mmol m<sup>-3</sup> in low-light-adapted strains of *Prochlorococcus marinus* (Scott *et al.*, 2007), concentrations that are rarely found in photic aquatic environments. Therefore, the kinetic properties of Rubisco appear to be related to CCM activity. For example, many red macroalgae such as *Lemanea* and *Batrachospermum* in fresh water and *Lomentaria* and *Delesseria* in marine systems with an assumed high specificity factor, lack a CCM (Raven and Beardall, 1981; Maberly, 1990). Tortell showed in an analysis of seven phytoplankters from different phylogenetic groups that there was an inverse relationship between  $\tau$  and the extent of a CCM (Tortell, 2000). Thus carbon uptake can either be

supported by Rubisco with a high specificity for CO<sub>2</sub> or by Rubisco with a lower affinity compensated for by a CCM that is more effective in terms of concentrating CO<sub>2</sub>.

#### Responses to CO<sub>2</sub> availability not involving a CCM

Not all photoautotrophs have a CCM (Raven *et al.*, 2005) and not all aquatic systems have low concentrations of CO<sub>2</sub>, at least as an annual mean as outlined above (Table 1). Thus, plants with an ‘avoidance strategy’ (*sensu* Klavsen *et al.*, 2011) may simply grow in environments where CO<sub>2</sub> is sufficient for their photosynthetic needs and therefore do not require a CCM. In the ‘exploitation strategy’, morphological and anatomical adaptations allow sources of CO<sub>2</sub> that are more reliable than the bulk water to be exploited. Concentrations of CO<sub>2</sub> within the sediment are high as photosynthesis is absent and organic matter is mineralized, generating CO<sub>2</sub>. Many freshwater macrophytes have extensive lacunae that can be continuous from root to shoot (Sculthorpe, 1967), providing a transport route for CO<sub>2</sub> from the sediment to the leaves. The possibility of this path as a carbon source was suggested in the older literature but first shown experimentally for the short isoetid *Lobelia dortmanna* (Wium-Andersen, 1971). This exploitation strategy is present in most isoetids (Winkel and Borum, 2009) but diffusion resistance within the lacunae limits its ability to supply CO<sub>2</sub> to species of short stature, and, consequently, in taller species such as *Myriophyllum spicatum*, root uptake contributes little to total carbon uptake (Loczy *et al.*, 1983). In the case of *Isoetes australis*, achlorophyllous leaf bases within the sediment also act as sources of CO<sub>2</sub> entry to the internal lacunae (Pedersen *et al.*, 2011). Borum *et al.* (2016) showed that oxygen concentrations in the buried base of the shoot of the seagrass *Zostera polyclamys* were 29% higher when the CO<sub>2</sub> concentration around the shoot was saturating compared with 9 mmol m<sup>-3</sup>. This implies some diffusion of gases between root and shoot, but the extent to which this supplies CO<sub>2</sub> to leaves is likely to be low given the diffusion distance; more work is warranted on this. It has also been suggested that early terrestrial lycopsids may also have benefited from tapping into elevated CO<sub>2</sub> within the sediment (Green, 2010).

Freshwater macrophytes form part of a cline from dry land with complete reliance on photosynthesis in air, to submergence with complete reliance on photosynthesis in water. This gradation also reflects the evolutionary invasion of terrestrial embryophytes into water (Du and Wang, 2014). The more constant supply of CO<sub>2</sub> in the atmosphere is an opportunity for submerged plants to maximize carbon uptake. In the freshwater macrophyte *Callitriche cophocarpa* which lacks a CCM, growth rates were stimulated 3-fold when floating leaves had access to atmospheric CO<sub>2</sub> and submerged leaves were at air equilibrium (Madsen and Breinholt, 1995). The benefit of atmospheric CO<sub>2</sub> to amphibious freshwater plants has been widely demonstrated and promotes flowering in *Nuphar lutea* and *Callitriche hamulata* (= *C. intermedia*; Grainger, 1947), increases soluble carbohydrate reserves in *Hippuris vulgaris* (Janauer and Englmaier, 1986), and stimulates photosynthesis in *Stratiotes aloides* (Prins and Deguia, 1986).

#### The nature of aquatic CCMs

Many types and mechanisms of CCM exist in aquatic photoautotrophs. Several rely on production of particular localized environments by special structures such as the carboxysome, pyrenoid, charosome, or transfer cells, of which for the latter more than one type is found in seagrasses (Larkum *et al.*, 2017). Some aquatic species possess biochemical CCMs analogous to those in terrestrial plants. The best known is that of the freshwater angiosperm *Hydrilla verticillata* that was studied by George Bowes and his group for over four decades (Bowes *et al.*, 2002; Bowes, 2011). This species is a member of the monocotyledon family Hydrocharitaceae, lacks Kranz anatomy, but possesses a facultative C<sub>4</sub> metabolism that is induced when CO<sub>2</sub> is limiting (Holaday and Bowes, 1980). Spatial separation between carboxylation and decarboxylation is achieved by PEPC being located in the cytoplasm while decarboxylation by NADP-malic enzyme (NADP-ME) occurs with Rubisco in the chloroplast (Reiskind *et al.*, 1989, 1997; Magnin *et al.*, 1997). Although also lacking Kranz anatomy, similar C<sub>4</sub> metabolism has been found in other species of the Hydrocharitaceae including *Egeria densa* (Casati *et al.*, 2000) and *Ottelia alismoides* (Zhang *et al.*, 2014). Unlike the other two species, *O. alismoides* appears to use NAD-ME rather than NADP-ME as the decarboxylating enzyme (Zhang *et al.*, 2014; Shao *et al.*, 2017). There is less detailed evidence for C<sub>4</sub> metabolism in marine angiosperms (seagrasses). It is possible that *Cymodocea nodosa*, *Halophila stipulacea*, and *Thalassia testudinum* possess C<sub>4</sub> metabolism (Beer *et al.*, 1980; Koch *et al.*, 2013), but further investigations are required. Within the marine macroalgae, there is good evidence for an ancient form of C<sub>4</sub> metabolism in the coenocytic, chlorophyte alga *Udotea flabellum* that is based on phosphoenolpyruvate carboxykinase (PEPCK) which acts as a carboxylase in the cytosol and a decarboxylase in the chloroplast (Reiskind *et al.*, 1988; Reiskind and Bowes, 1991). There are hints of possible C<sub>4</sub> metabolism in the brown alga *Dictyota guineënsis* and the red alga *Palisada perforata* (= *Laurencia papillosa*) based on activities of PEPC and PEPCK compared with Rubisco (Holbrook *et al.*, 1988; Koch *et al.*, 2013; see also Raven and Giordano, 2017). The marine diatom *Thalassiosira weissflogii* has been proposed to possess single-cell C<sub>4</sub> metabolism (Reinfelder *et al.*, 2000; Reinfelder, 2011), although the evidence for this is not very conclusive (Clement *et al.*, 2017a, b). Although not fully resolved, recent studies, on *T. pseudonana* (Tanaka *et al.*, 2014; Clement *et al.*, 2016, 2017b) and *P. tri-cornutum* (Haimovich-Dayana *et al.*, 2013; Yang *et al.*, 2016; Clement *et al.*, 2017a) using different approaches suggest that these species do not possess C<sub>4</sub> metabolism.

Aquatic CAM was first shown in the freshwater lycophyte *Isoetes howellii* (Keeley, 1981, 2014) and has been recorded in all species of *Isoetes* that have been studied (Keeley, 1998). It is also found in other freshwater angiosperms including *Littorella uniflora* (Madsen, 1987b; Robe and Griffiths, 2000), *Crassula helmsii* (Newman and Raven, 1995), *Deinostema violaceum* (Yin *et al.*, 2017), and *O. alismoides* (Zhang *et al.*, 2014; Shao *et al.*, 2017). The presence of CAM in marine macroalgae is unclear (Koch *et al.*, 2013). Low amplitude diel

changes in acidity have been reported in *Ascophyllum nodosum* (Johnston and Raven, 1987) and some other furoid algae (Keeley, 1998), but more research is required to determine whether or not this constitutes CAM activity.

The remainder of aquatic CCMs are based on biophysical active transport of  $\text{CO}_2$ ,  $\text{HCO}_3^-$ , or both (Raven and Beardall, 2016). The most widespread CCM in aquatic plants is based on access to  $\text{HCO}_3^-$  and is likely to depend on more than one mechanism. One, found notably in leaves of the monocotyledon genera *Potamogeton*, *Elodea*, *Egeria*, and *Hydrilla*, involves polar leaves. Protons are excreted at the abaxial surface, converting bicarbonate to  $\text{CO}_2$ , some of which will diffuse into the leaf, while at the adaxial surface net hydroxide excretion leads to the deposition of marl (Stemann Nielsen, 1947; Prins *et al.*, 1980, 1982; Prins and Elzenga, 1989). A similar process occurs in charophytes where acid and alkaline bands are present along the axis of giant cells (Lucas and Smith, 1973).

Some freshwater angiosperms that can use  $\text{HCO}_3^-$ , such as the dicotyledon genera *Myriophyllum* or *Ranunculus*, lack spatial patterns of acid and alkaline zones and instead  $\text{H}^+$ - $\text{HCO}_3^-$  co-transport has been proposed (Prins and Elzenga, 1989). In marine macroalgae, also without evidence of acid or alkaline zones, there is a range of different proposed mechanisms (Raven and Hurd, 2012). These include bicarbonate transporters in *Ectocarpus siliculosus* (Gravot *et al.*, 2010), anion exchange proteins in *Macrocystis pyrifera* (Fernández *et al.*, 2014), and proton extrusion acting with external carbonic anhydrase (but not involving acid and alkaline zones) in *Saccharina latissima* (= *Laminaria saccharina*) (Axelsson *et al.*, 2000). The green alga *Ulva lactuca* possesses two mechanisms to use  $\text{HCO}_3^-$ , one based on carbonic anhydrase and external acidification of the boundary layer at seawater pH, again without discernible acid and alkaline zones, and one based on an anion transporter that is up-regulated after incubation at high pH (Axelsson *et al.*, 1995).

CCMs in cyanobacteria are among the best studied of any group of photosynthetic organisms. Active transporters of  $\text{CO}_2$  and  $\text{HCO}_3^-$  produce a large internal pool of  $\text{HCO}_3^-$  that is converted to  $\text{CO}_2$  around Rubisco within specialized structures that restrict leakage: carboxysomes (Price *et al.*, 2008; Price, 2011). *Chlamydomonas reinhardtii* has the best-studied eukaryotic CCM that involves  $\text{HCO}_3^-$  transporters located at the plasmalemma and the outer stromal membrane that generate high concentrations of  $\text{HCO}_3^-$  in the chloroplast stroma (Wang *et al.*, 2011). There are at least 12 genes present encoding carbonic anhydrases in different locations (Moroney *et al.*, 2011). The  $\alpha$ -carbonic anhydrase in the acid thylakoid lumen (CA3) is believed to increase the rate of conversion of  $\text{HCO}_3^-$  to  $\text{CO}_2$  which can then diffuse out to the surrounding pyrenoid which is the location of Rubisco. A  $\beta$ -carbonic anhydrase (CA6) in the stroma has been suggested to trap  $\text{CO}_2$  that has diffused out of the lumen and bypassed the pyrenoid by speeding its conversion back to  $\text{HCO}_3^-$  (Moroney *et al.*, 2011).

In diatoms, several biophysical CCM mechanisms are involved including bicarbonate active transporters (Matsuda *et al.*, 2011; Nakajima *et al.*, 2013) and carbonic anhydrase enzymes (Harada *et al.*, 2005; Trimborn *et al.*, 2009; Crawford

*et al.*, 2011; Hopkinson *et al.*, 2011, 2013; Clement *et al.*, 2016, 2017a). The nature of the CCM has also been studied in other marine phytoplankton including chlorophytes and other chromalveolates from the dinoflagellates, haptophytes (including coccolithophores), and eustigmatophytes (Huertas *et al.*, 2000; Colman *et al.*, 2002; Rost *et al.*, 2003; Dason *et al.*, 2004; Hoins *et al.*, 2016; Kottmeier *et al.*, 2016). These and other studies (Riebesell *et al.*, 1993; Clark and Flynn, 2000; Clement *et al.*, 2017a) show that there is a large diversity in the ability of marine phytoplankton to utilize the carbon reserves.

## Regulation of CCMs by environmental conditions

It has been known for a long time that algae are phenotypically plastic and their photosynthetic characteristics can be altered by environmental conditions (e.g. Briggs and Whittingham, 1952). In microalgae where this regulation has been best studied and for which a substantial literature exists, a CCM is rapidly up-regulated at low  $\text{CO}_2$  and down-regulated at high  $\text{CO}_2$  (Giordano *et al.*, 2005). Similar regulation of  $\text{HCO}_3^-$  use occurs in freshwater macrophytes (Sand-Jensen and Gordon, 1986; Madsen *et al.*, 1996; Adamec, 2009). In *Myriophyllum alterniflorum* there are phenotypic differences between populations from low and high alkalinity sites which largely disappear after incubation in standard conditions (Maberly and Madsen, 2002a).  $\text{C}_4$  metabolism in freshwater macrophytes is up-regulated when inorganic carbon is limiting in *H. verticillata* and *E. densa* (Casati *et al.*, 2000; Bowes, 2011), but appears to be constitutive in *O. alismoides* (Zhang *et al.*, 2014). In contrast,  $\text{C}_4$  metabolism is present in leaves of *Eleocharis vivipara* when in air but absent when in water (Ueno, 1998; Murphy *et al.*, 2007). CAM activity in freshwater macrophytes is up-regulated at low  $\text{CO}_2$  and high light (Madsen, 1987a; Robe and Griffiths, 1990; Baattrup-Pedersen and Madsen, 1999; Klavsen and Maberly, 2010; Shao *et al.*, 2017) and can also be down-regulated when leaves are exposed to the more constant supply of  $\text{CO}_2$  in air (Aulio, 1986; Robe and Griffiths, 2000; Yang and Liu, 2015). In the halotolerant *Dunaliella salina*, high salinity ( $2.22 \text{ kmol m}^{-3}$  NaCl) promoted a CCM, presumably because high salinity reduces the solubility of  $\text{CO}_2$  (Booth and Beardall, 1991).

Low light can lead to a reduction in CCM activity in eukaryotic and prokaryotic microalgae (Beardall, 1991; Beardall and Giordano, 2002; Raven and Beardall, 2014). There is evidence of regulation of CCMs in microalgae by variation in the concentration and form of nitrogen and the concentration of phosphorus (Beardall and Giordano, 2002; Raven and Beardall, 2014). However, for both elements, both increases and decreases in inferred activity of a CCM in response to limitation have been recorded (Raven and Beardall, 2014).

## Costs and benefits of CCMs

The fact that CCMs occur in some but not all species, are frequently down-regulated when inorganic carbon is not limiting (Giordano *et al.*, 2005) and can be lost in microalgae

evolving over 1000 generations at high CO<sub>2</sub> (Collins *et al.*, 2006) indicates that their operation incurs costs as well as conferring benefits.

### Energy costs

By definition, a CCM involves an energy cost because it generates a concentration of CO<sub>2</sub> at the active site of Rubisco above that which could be achieved by passive processes. However, Sage and Khoshroavesh (2016) point out that locating photorespiratory and respiratory release of CO<sub>2</sub> close to Rubisco may act as a passive CCM that can mitigate, rather than overcome, the consequences of Rubisco's properties. An active CCM will incur energy costs for investing in catalytic machinery and running the CCM (Raven and Lucas, 1985). This has ecological relevance because light is often, although not always, a limiting resource for aquatic photoautotrophs because of the relatively high rates of attenuation in aquatic environments (Maberly, 2014). A detailed calculation of the theoretical minimum energy (photon) running costs has been undertaken by Raven *et al.* (2014) as mol photons absorbed per mol carbon fixed. They estimated that when a CCM is absent, the minimum photon cost will be between 9.92 and 9.96. Assuming that no leakage of CO<sub>2</sub> is occurring out of the site where it is accumulated, the minimum photon cost when CCM is active varies between 9.25 and 10, depending on the precise CCM. Assuming a leakage rate equivalent to the rate of photosynthesis, the photon cost increases to between 9.5 mol and 11 mol photons absorbed per mol carbon fixed (Raven and Beardall, 2016). The additional costs of producing the CCM machinery are more uncertain and complicated by trade-offs with other resources such as nitrogen and phosphorus.

A CCM is present in psychrophilic marine diatom communities from the Western Antarctic Peninsula, including species such as *Fragilariopsis cylindrus*. However, it operates with a relatively low energy cost (Kranz *et al.*, 2015) because at 0 °C the Michaelis constant for Rubisco ( $K_c$ ) is only 15 mmol CO<sub>2</sub> m<sup>-3</sup> while at air equilibrium the CO<sub>2</sub> concentration is 25 mmol m<sup>-3</sup> (Young *et al.*, 2015). Even though the ambient CO<sub>2</sub> concentration had been reduced to ~6 mmol m<sup>-3</sup> in a bloom, the diatoms were nearly saturated with inorganic carbon by the CCM at a low energy cost (Kranz *et al.*, 2015; Young *et al.*, 2015).

### Affinity costs

A less recognized cost of operating at least some types of CCM relates to the affinity for CO<sub>2</sub>. In a review of the kinetics of CO<sub>2</sub> uptake from a range of freshwater macrophytes, it was shown that the  $K_{1/2}$  for CO<sub>2</sub> for species able to use HCO<sub>3</sub><sup>-</sup> as well as CO<sub>2</sub> was ~210 mmol m<sup>-3</sup> but only 108 mmol m<sup>-3</sup> for species restricted to CO<sub>2</sub> (Maberly and Madsen, 1998). The slope of CO<sub>2</sub> uptake per CO<sub>2</sub> concentration was similarly greater in species restricted to CO<sub>2</sub>. Using experiments in different gas mixtures, including helium, it was shown that species with the ability to use HCO<sub>3</sub><sup>-</sup> have a higher internal resistance to CO<sub>2</sub> uptake than species restricted to CO<sub>2</sub> (Madsen and Maberly, 2003). This also occurs in other types of photoautotrophs; the

permeability of plasmalemma from *C. reinhardtii* grown at high CO<sub>2</sub> is ~1.7 times greater than those grown at low CO<sub>2</sub>, consistent with these differences (Raven and Beardall, 2016). However, if a species is concentrating CO<sub>2</sub> internally with a CCM, a high permeability runs the risk of futile cycling. The different affinities of macrophytes with and without an ability to use HCO<sub>3</sub><sup>-</sup> has a clear potential ecological significance in shallow water where light energy is high.

### Other costs

There are other largely unquantified costs, or at least trade-offs, involved in the operation of a CCM. These involve a different element requirement when a CCM is present or absent (Raven and Johnston, 1991). For example, the enzyme carbonic anhydrase is ubiquitously up-regulated along with a CCM which will incur some attendant cost, including those for the uptake of elements such as Zn, Co, or Cd that can be present at low concentration, especially in the open ocean (Lane and Morel, 2000). In marine phytoplankton, N and P quotas also vary with CO<sub>2</sub> concentration (Reinfelder, 2012), but the extent to which these incur a cost or benefit is poorly constrained.

### Benefits

The benefits of operating a CCM have been alluded to and include reducing rates of photorespiration, increasing rates of photosynthesis when CO<sub>2</sub> is limiting, and extending the amount of carbon that is accessible to photosynthesis during carbon depletion. An example of these benefits is shown in Fig. 3 where rates of carbon uptake for three species of the freshwater macrophyte *Myriophyllum* which vary in the presence and effectiveness of their CCM are compared. *Myriophyllum verticillatum* lacks a CCM, being reliant on CO<sub>2</sub> alone, and had a CO<sub>2</sub> compensation point of 3.2 mmol m<sup>-3</sup> allowing it to remove only 4% of the available inorganic carbon. *Myriophyllum alterniflorum* and *M. spicatum* were able to use CO<sub>2</sub> and HCO<sub>3</sub><sup>-</sup> and, while *M. alterniflorum* could remove 51% of the available inorganic carbon, *M. spicatum* was even more effective and removed 80% of the available carbon. Rates at air equilibrium, ~15 mmol m<sup>-3</sup>, as a percentage of those at 200 mmol m<sup>-3</sup>, which was not quite saturating, were 3, 20, and 34% in *M. verticillatum*, *M. alterniflorum*, and *M. spicatum*, respectively (Fig. 3B), showing that the CCM based on HCO<sub>3</sub><sup>-</sup> use increased rates of photosynthesis at air equilibrium in addition to increasing the pool of available inorganic carbon. For two of these species of *Myriophyllum*, these photosynthesis differences have recently been shown to translate to benefit growth at low CO<sub>2</sub>; *M. spicatum* growth was much less affected by CO<sub>2</sub> depletion than *M. verticillatum* (Dulger and Hussner, 2017).

## Frequency and extent of CCMs in different types of photoautotroph

In addition to phenotypic plasticity in the activity of CCMs within a given species, there are genotypic differences in the effectiveness of CCMs to exploit the inorganic carbon



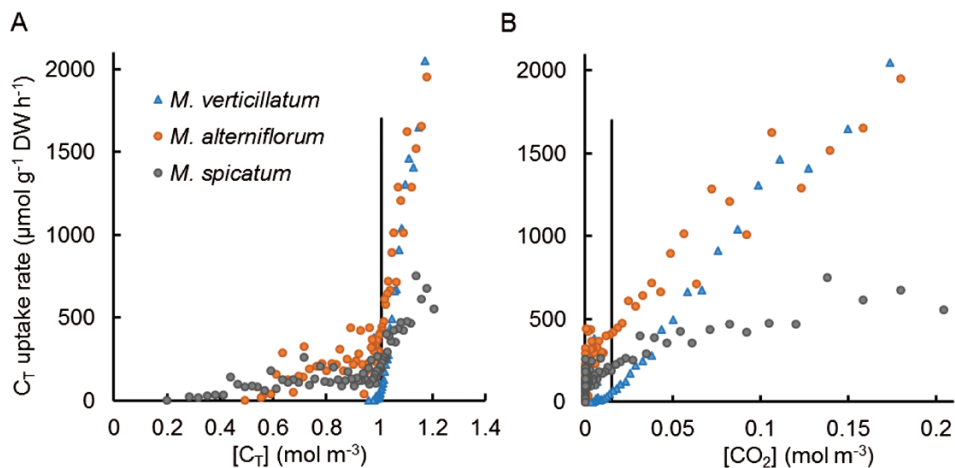

**Fig. 3.** Comparison of the rate of carbon uptake versus the concentration of total inorganic carbon during a pH-drift experiment for three species of *Myriophyllum*. Rates are expressed as a function of concentration of: (A)  $C_T$  and (B)  $CO_2$ . Plants were collected from different sites but grown under standard conditions before the experiments. Drift conditions: alkalinity, 1 equivalent  $m^{-3}$ ; temperature, 20 °C; light, 500  $\mu mol m^{-2} s^{-1}$  photosynthetically available radiation (SCM, unpublished). The vertical line shows the air equilibrium (400  $\mu atm$ ) conditions. More detail is provided in the Supplementary methods.

reserves among different species which together generate a gradient in ability to deplete inorganic carbon in freshwater macrophytes and phytoplankton (Talling, 1976; Allen and Spence, 1981). Figure 4 presents the compiled published and unpublished results for different types of aquatic photoautotrophs on the extent to which inorganic carbon can be removed from water based on pH-drift experiments. Percentage carbon availability is calculated from the calculated or measured concentration of  $C_T$  at the end of a drift compared with the alkalinity of the medium. There is a wide range of ability to exploit the inorganic carbon reserves within each group, with species without a CCM only being able to remove a small fraction of the available carbon compared with species with an effective CCM. The seagrasses and marine phytoplankton had the highest median ability to remove inorganic carbon and the freshwater macrophytes clearly had the lowest (Fig. 4). However, freshwater macrophytes, freshwater phytoplankton, and marine macroalgae had the largest range in ability to remove inorganic carbon, while the seagrasses (although with a limited number of species tested) and marine phytoplankton had the lowest range. Thus, broadly comparing marine and freshwater photoautotrophs, the marine photoautotrophs had a 1.7-fold greater median ability to extract inorganic carbon while the freshwater photoautotrophs had a 1.4-fold greater range in ability to extract inorganic carbon.

The lower median capability of freshwater macrophytes to exploit the reserves of inorganic carbon is consistent with their alternative strategies for acquiring inorganic carbon described above. Thus, only 50 species of the 110 tested (45%) are able to use  $HCO_3^-$  (Fig. 5A). Four species perform  $C_4$  photosynthesis and nine species perform CAM based on diel acidity changes. All the species with  $C_4$  also use  $HCO_3^-$ , while only three species, *Ottelia alismoides* (Zhang *et al.*, 2014) and possibly *Scirpus subterminalis* (Beer and Wetzel, 1981) and *Vallisneria spiralis* (Yin *et al.*, 2017), combine both CAM and  $HCO_3^-$  use. *Ottelia alismoides* appears, uniquely, to combine three different types of CCM,  $HCO_3^-$  use,  $C_4$ , and CAM (Shao *et al.*, 2017). Fifty-two species have no apparent CCM.

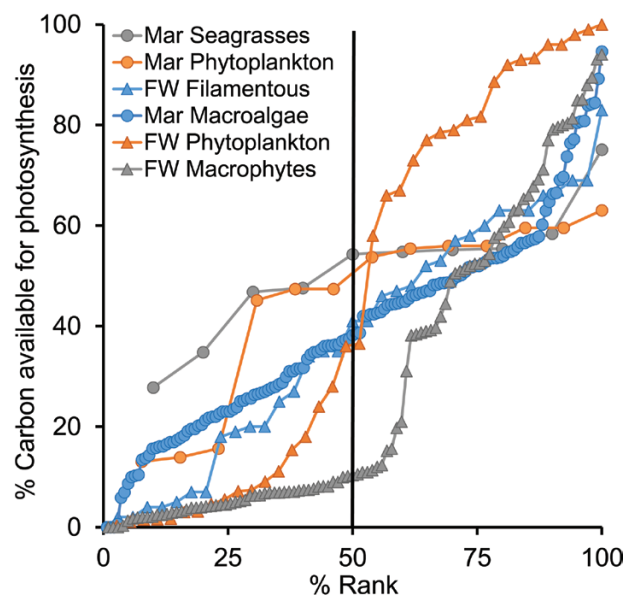

**Fig. 4.** Gradation in ability to remove inorganic carbon based on pH-drift experiments for different groups of aquatic photoautotrophs. These include, in order of decreasing median ability: seagrasses (10 species); marine phytoplankton (13 species); filamentous freshwater algae (34 species); marine macroalgae (142 species); freshwater phytoplankton (37 species); freshwater macrophytes (102 species). The vertical line shows the median ability for each group. More detail is provided in the Supplementary methods and the data are available in Supplementary Table S1.

Of these, 69% have access to  $CO_2$  from the atmosphere or sediment, or grow in environments where  $CO_2$  is likely to be high locally (Fig. 5B). In contrast, only ~24% of species with an ability to use  $HCO_3^-$  have alternative strategies, and these largely comprise  $C_4$  metabolism and access to atmospheric  $CO_2$ .

Most groups of eukaryotic algae and aquatic plants contain species with and without CCMs (Raven *et al.*, 2005). Nevertheless, phylogenetic differences underlie some of the variation in ability to remove inorganic carbon. Of particular note for their apparently uniform absence of a CCM is

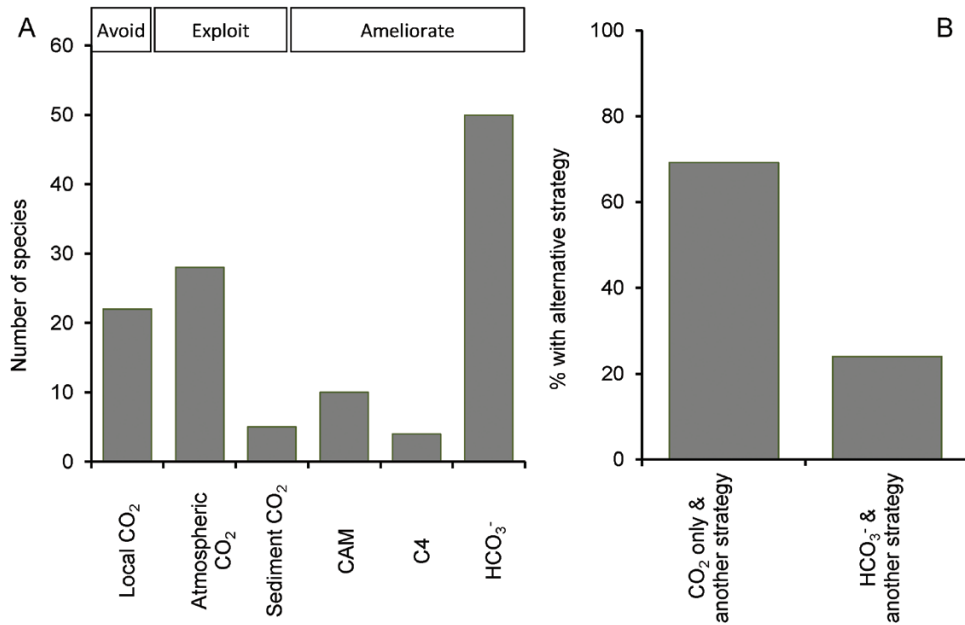

**Fig. 5.** Number of species of freshwater macrophytes with different strategies for obtaining inorganic carbon in photosynthesis. (A) Species, categorized following Klavsen *et al.* (2011); (B) percentage of CO<sub>2</sub> only or HCO<sub>3</sub><sup>-</sup> species with alternative strategies. More detail is provided in the Supplementary methods.

the group of heterokont algae, the Chrysophyceae *sensu lato* (=Synurophyceae and Chrysophyceae). No species studied from this group has been shown to be able to use HCO<sub>3</sub><sup>-</sup>, and there is no evidence for the operation of a CCM (Saxby-Rouen *et al.*, 1998; Maberly *et al.*, 2009; Bhatti and Colman, 2011). There are no clearly attested freshwater bryophytes or lycophytes with a CCM (Spence and Maberly, 1985) apart from in one experiment with *Fontinalis antipyretica* (Penuelas, 1985), and a possible CCM in an aquatic hornwort (Bain and Proctor, 1980), although terrestrial species from this group do have a CCM (Villarreal and Renner, 2012). Within the freshwater macrophyte genus *Callitriche*, most species lack a CCM but two of the three species within the subgenus *Pseudocallitriche* (Philbrick and Les, 2000), *C. hermaphroditica* (Maberly and Madsen, 2002b) and *C. truncata* (S.M. Whitney and S.C. Maberly, unpublished) can also use HCO<sub>3</sub><sup>-</sup>; the third species, has not yet been tested. Within the prokaryotes, all tested species of cyanobacteria appear to possess a CCM which compensates for the low affinity of their Rubisco enzyme. This is also the case for a culture of *Merismopedia glauca*, collected from the New Forest, UK (SCM, unpublished), which can grow in eutrophic lakes (e.g. Yamamoto and Shiah, 2012), but the genus contains species such as *M. tenuissima* that are often dominant in acid sites and absent when pH is increased by liming (Anderson *et al.*, 1997). Work is required on *M. tenuissima* to determine if this acid-tolerant cyanobacterium possesses a CCM.

### Environmental conditions and CCM activity: towards establishing inorganic carbon as an ecological factor

In some circumstances, inorganic carbon can limit the primary productivity of marine phytoplankton (Riebesell *et al.*,

1993; Hein and Sand-Jensen, 1997; Clark and Flynn, 2000), freshwater phytoplankton (Ibelings and Maberly, 1998; Jansson *et al.*, 2012), marine macroalgae (Holbrook *et al.*, 1988), seagrasses (Borum *et al.*, 2016), and freshwater macrophytes (Madsen and Maberly, 1991). Given this and the environmental variability in inorganic carbon concentrations and other resources and the wide variability in abilities of aquatic photoautotrophs to acquire inorganic carbon, it is likely that inorganic carbon is one of the environmental factors that controls the ecological distribution of aquatic photoautotrophs. Some of the differences between marine and freshwater photoautotrophs in Fig. 4 can be accounted for, in part, by the availability of inorganic carbon in the respective environments. The marine environment has a nearly uniform concentration of HCO<sub>3</sub><sup>-</sup> and a lower variability in CO<sub>2</sub> concentrations and CO<sub>2</sub> sources than freshwaters, increasing the benefit of using HCO<sub>3</sub><sup>-</sup> but not placing a premium on a highly effective CCM. In contrast, the freshwater environment has highly variable concentrations of both HCO<sub>3</sub><sup>-</sup> and CO<sub>2</sub>, and CO<sub>2</sub> from the sediment or atmosphere can be accessed, so some species would not benefit from using HCO<sub>3</sub><sup>-</sup>; however, a highly effective CCM is needed to continue to photosynthesize during episodes of extreme carbon depletion. Below, three examples of the interaction between CCMs and ecology are outlined.

#### CCMs and distribution of freshwater macrophytes

The high CO<sub>2</sub> concentrations that exist in some freshwater environments allow plants that grow there to survive without a CCM. For example, the freshwater moss *F. antipyretica* lacks a CCM but survives in a lake, Esthwaite Water, UK, where surface concentrations of CO<sub>2</sub> in summer are extremely low (Fig. 2). This is possible because it grows close to the sediment surface where CO<sub>2</sub> concentrations were on average

$\sim 120 \text{ mmol m}^{-3}$  and reached a maximum of  $270 \text{ mmol m}^{-3}$ , and were close to saturating for *F. antipyretica* (Maberly, 1985a, b). In another example, *F. antipyretica* and the submerged form of *Berula erecta*, both of which are restricted to  $\text{CO}_2$ , grew immediately downstream of the source of the River La Sorgue, in southern France, fed by groundwater where the  $\text{CO}_2$  concentration was in excess of  $400 \text{ mmol m}^{-3}$  (Maberly et al., 2015). Species of low stature may benefit from the locally high concentrations of  $\text{CO}_2$  above the sediment surface and these may account for at least 15% of the >100 species tested (Fig. 5), but this is almost certainly an underestimate of the importance of this strategy since seedlings or small shoots will also benefit from these carbon sources, as will species growing in otherwise heterotrophic areas with generally elevated  $\text{CO}_2$  concentrations. Carnivorous plants such as *Aldrovanda vesiculosa* and species of *Utricularia* that typically grow in dystrophic sites with low nutrient concentrations, low oxygen concentrations, but high  $\text{CO}_2$  concentrations also lack a CCM (Adamec, 1997a, b, 2009). However, one population of *U. australis* from a site with low  $\text{CO}_2$  showed some evidence for  $\text{HCO}_3^-$  use (Adamec, 2009), so more work is needed on the extent of genotypic or phenotypic plasticity in this species. Rivers tend to have higher concentrations of  $\text{CO}_2$  than lakes because they are closer to the source of  $\text{CO}_2$  produced by decomposition processes within the catchment (Sand-Jensen and Frost-Christensen, 1998). Comparing species of freshwater macrophyte found in both rivers and lakes using the pH-drift technique, those from rivers had a slightly lower median ability to extract inorganic carbon than those in lakes (Baattrup-Pedersen et al., 2013).

The link between water chemistry and freshwater macrophyte distribution has been known for many decades (e.g. Iversen, 1929; Hutchinson, 1970), and Hutchinson (1970) made this link explicitly for species of *Myriophyllum*. These patterns, particularly since pH and alkalinity are often the key variables linked to distribution, have been associated with macrophyte carbon physiology (e.g. Spence, 1967). An example can be seen for the survey of macrophytes in 82 Danish lakes, reported by Vestergaard and Sand-Jensen (2000). The

lakes were categorized into five groups based on their macrophyte communities, and the concentrations of  $\text{HCO}_3^-$  and  $\text{CO}_2$  in the five lake groups were measured. Here, the macrophytes within each of these groups were assigned to whether or not they could use  $\text{HCO}_3^-$  and the extent to which they could deplete inorganic carbon based on pH-drift experiments using the information compiled in Supplementary Table S1 at JXB online. The average difference in the ability of the macrophytes in each group to exploit the inorganic carbon reserves was significantly related to the carbonate chemistry: the percentage carbon available increased with  $\text{HCO}_3^-$  concentration and pH, and decreased with  $\text{CO}_2$  (Fig. 6). Very similar results were obtained based on the proportion of species able to use  $\text{HCO}_3^-$  instead of the ability to extract inorganic carbon (data not shown). While numerous environmental conditions control the distribution of macrophytes, the results in Fig. 6 show that high concentrations of  $\text{HCO}_3^-$  and low concentrations of  $\text{CO}_2$  favour species with an ability to use  $\text{HCO}_3^-$ . These two factors are linked since  $\text{HCO}_3^-$  concentration (alkalinity) along with lake depth can be used to predict background phosphorus concentration in lakes (Vighi and Chiaudani, 1985), and this nutrient often limits lake productivity, and hence controls summer depletion of  $\text{CO}_2$ .

#### CCMs and distribution of freshwater phytoplankton

Within freshwater phytoplankton, species from acid sites where concentrations of  $\text{HCO}_3^-$  are minimal or absent have a lower ability to remove inorganic carbon than species from neutral or alkaline sites. The ellipsoidal form of the trebouxiophyte *Watanabea* sp., which in culture at pH 2 was the predominant form at low  $\text{CO}_2$  concentrations (Diaz and Maberly, 2009), appeared to operate a CCM but, in the absence of  $\text{HCO}_3^-$  at this pH, this must have been based on active uptake of  $\text{CO}_2$ . The spheroidal form of this species and other species tested from the highly acid Lake Caviahue and its inflows in Argentina appeared largely to lack CCMs. Similarly, the acidophile *Chlamydomonas acidophila* and the

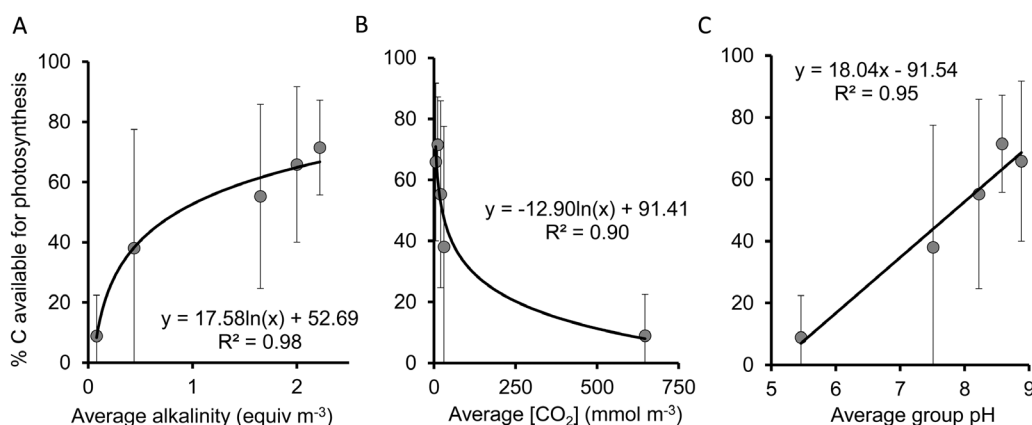

**Fig. 6.** Relationship between the ability of submerged macrophytes to remove inorganic carbon and their presence in groups of Danish lakes of different water chemistry. Lake groups characterized in terms of (A) alkalinity, (B)  $\text{CO}_2$  concentration, and (C) pH. Error bars show 1 SD; the group means were fitted to a log or linear equation the parameters of which are shown. Lake data are derived from Vestergaard and Sand-Jensen (2000). More detail is provided in the Supplementary methods.

acid-tolerant *C. pitschmannii*, with optima for growth of pH 3.6 and pH 5.3, respectively, mainly relied on CO<sub>2</sub> as a source of inorganic carbon (Lachmann *et al.*, 2016). In contrast, the neutrophiles *C. reinhardtii* and *Scenedesmus vacuolatus* with optima for growth of pH 6.3 and 8.1, respectively, were effective HCO<sub>3</sub><sup>-</sup> users. A similar link between pH preference and the presence or effectiveness of a CCM has also been shown for desmids. Species such as *Staurastrum chaetoceras* and *S. planktonicum* found in alkaline lakes were highly effective at removing inorganic carbon, while species such as *S. brachiatum* restricted to acidic water had a much less effective CCM (Spijkerman *et al.*, 2005).

To illustrate the spatial and temporal variation in carbon removal ability in freshwater phytoplankton, samples were collected in spring and summer from four lakes in Cumbria which

differed in their alkalinity, productivity, and extent of carbon depletion (Fig. 7). Net phytoplankton from each lake were assessed for their ability to remove inorganic carbon using pH-drift experiments. There were large differences among seasons and lakes in the ability of the phytoplankton to remove inorganic carbon, but adjusting the concentration of HCO<sub>3</sub><sup>-</sup> to a standard value had no significant effect (ANOVA,  $P=0.000$  for lake and season but  $P=0.089$  for bicarbonate treatment). In the least productive lake, Derwentwater, where surface concentrations of CO<sub>2</sub> never fell below air equilibrium, minimum CO<sub>2</sub> concentrations at the end of the drift were >1 mmol m<sup>-3</sup> in spring and summer, suggesting that the phytoplankton population as a whole did not have a CCM. In contrast, in the most productive lake, Esthwaite Water, where summer lake CO<sub>2</sub> concentrations fell to ~100 times below air equilibrium

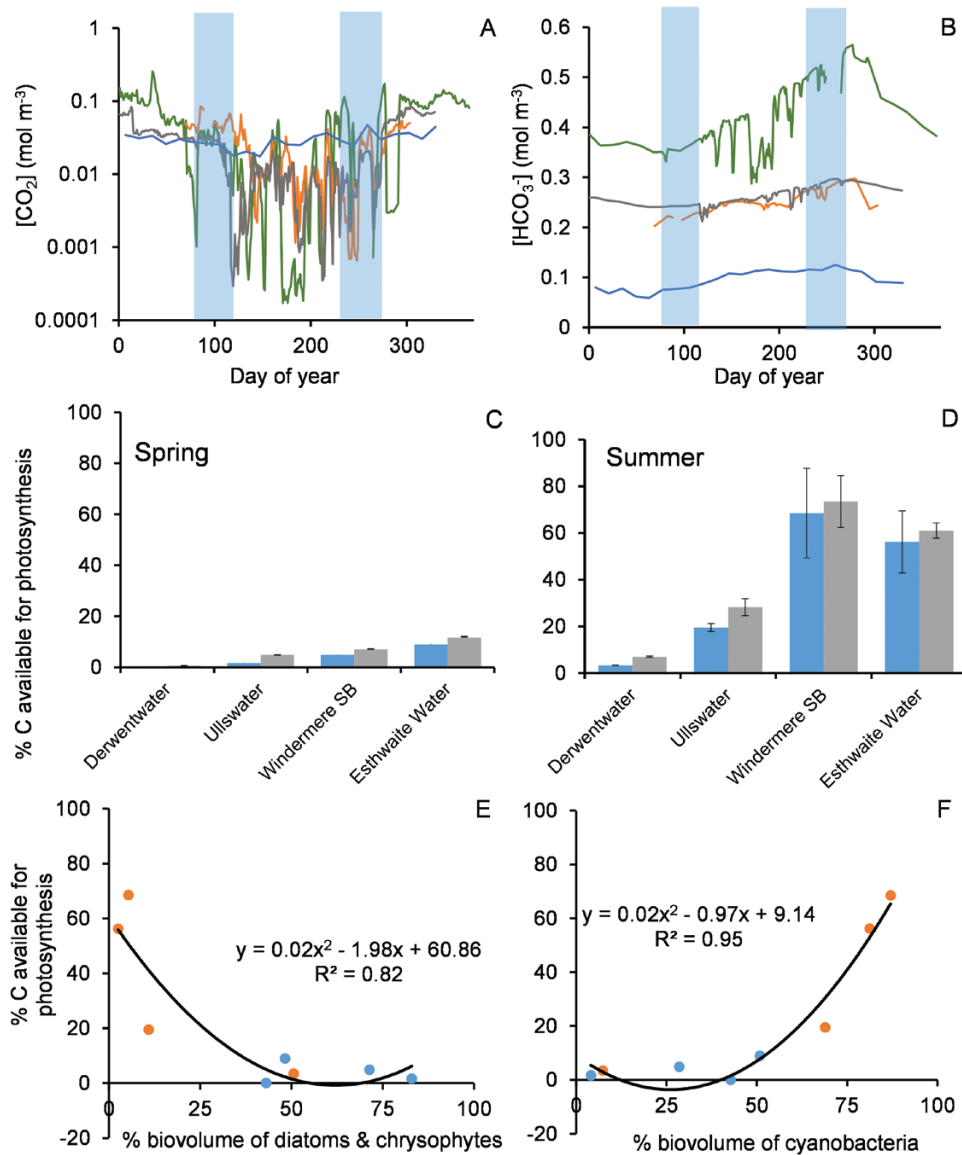

**Fig. 7.** Seasonal and phylogenetic variation in ability of freshwater phytoplankton to remove inorganic carbon. (A) Seasonal variation in CO<sub>2</sub> concentration (log scale) for Derwentwater (blue), Ullswater (orange), Windermere South Basin (grey), and Esthwaite Water (green); the blue shading shows the times when the experiments were performed. (B) As for (A), but HCO<sub>3</sub><sup>-</sup> concentration. (C) Percentage carbon removal for the four lakes in spring at ambient (grey) or a standard (blue) concentration of HCO<sub>3</sub><sup>-</sup> of ~0.55 mmol m<sup>-3</sup>; error bars show 1 SD. (D) as for (C) but for summer. (E) Percentage carbon available as a function of percentage contribution of diatoms plus chrysophytes to total biovolume in spring (blue) or summer (orange) with polynomial fit for combined seasonal data. (F) as for (E), but percentage contribution of cyanobacteria. More detail is provided in the Supplementary methods.

( $\sim 0.17 \text{ mmol m}^{-3}$ ), the final  $\text{CO}_2$  in drifts were substantially below the nominal  $1 \text{ mmol m}^{-3}$  threshold in spring and summer. The difference between the lake phytoplankton in their ability to remove inorganic carbon was closely related to species composition. In the lakes where low  $\text{CO}_2$  concentrations favoured cyanobacteria (Shapiro, 1997), the phytoplankton population had a much greater ability to remove carbon than in those dominated by diatoms and chrysophytes (Fig. 7E, F). Thus, the ability of the phytoplankton population to remove inorganic carbon decreased with increasing percentage biovolume of diatoms and chrysophytes, and conversely increased with increasing percentage biovolume of cyanobacteria. This is consistent with seasonal differences seen in Esthwaite Water, with spring diatoms having a lower ability to remove inorganic carbon than the summer cyanobacteria (Talling, 1976). These results suggest that inorganic carbon removal from productive lakes shifts the phytoplankton population towards species with effective CCMs, although the dynamic nature of these lakes where wind mixing can entrain pH from depth (Maberly, 1996) means that short-lived windows of higher  $\text{CO}_2$  may occur that could be exploited by rapidly growing species without a CCM.

There is also evidence for intraspecific carbon competition within the widespread cyanobacterium *Microcystis* that can dominate during high-pH episodes in nutrient enriched lakes (Talling, 1976). A study of 20 different strains of *Microcystis aeruginosa* showed variation in the presence of genes coding for different components of the CCM (Sandrini *et al.*, 2014). Thus while all 20 strains possessed genes for the  $\text{HCO}_3^-$  uptake system *BCT1*, 11 strains lacked the  $\text{HCO}_3^-$  transporter gene *BicA* and another strain lacked the  $\text{HCO}_3^-$  transporter gene *SbtA*. Measurements in a lake, and in laboratory experiments, showed that there was a trade-off between the activity of these transporters and inorganic carbon availability. When inorganic carbon availability was high, populations were dominated by genotypes with the *bicA* gene which had a low affinity for  $\text{HCO}_3^-$  but a high rate of flux, while at low inorganic carbon availability populations were dominated by genotypes with *SbtA* which has a much higher affinity for  $\text{HCO}_3^-$  but a lower rate of flux (Sandrini *et al.*, 2016). Thus, the effectiveness of cyanobacterial CCMs, the high phenotypic variability of a given genotype and physiological differences among genotypes make cyanobacteria powerful competitors for inorganic carbon with other types of phytoplankton.

#### Growth in low light environments

Unlike the other marine photosynthetic organisms, marine macroalgae had a large range of ability to exploit the reserves of inorganic carbon. In agreement with expectations related to the additional energy costs of operating a CCM, there are indications that marine macroalgae growing in subtidal or shaded environments lack or have a low CCM activity. Thus, in a survey of 35 marine macroalgae, species from the sublittoral, especially understory species that might be further shaded by larger kelps, had a significantly lower ability to remove inorganic carbon than intertidal or rockpool species and largely lacked a CCM (Maberly, 1990). Many of these shaded subtidal

species were Rhodophyta and, in a study restricted to this group, Murru and Sandgren (2004) found a similar pattern, and a larger synthesis of data for all types of marine macroalgae reinforced this (Stepien, 2015; Stepien *et al.*, 2016). Thus the cost of operating a CCM in a low light environment appears to outweigh the benefits, which are arguably low because light, rather than inorganic carbon, may be limiting and concentrations of  $\text{CO}_2$  unlikely to be depleted below air equilibrium.

Low light usually restricts the growth of freshwater macrophytes at depth (Spence, 1967). A compilation of depth limits and minimum light requirements for different groups of freshwater macrophytes showed that bryophytes were often found at the depth limit and had the lowest light requirement of  $\sim 2.2\%$  of surface light (Middelboe and Markager, 1997) while depth limits for charophytes, elodeid, and isoetid macrophytes were at higher light levels. Since virtually all freshwater bryophytes lack a CCM, the saved energy costs may be one of the characteristics permitting growth at low light.

## Conclusions

Dissolved inorganic carbon is potentially more limiting for aquatic photoautotrophs than  $\text{CO}_2$  in air is for terrestrial plants because of low rates of  $\text{CO}_2$  diffusion in water and, particularly in fresh waters, strong seasonal depletion of inorganic carbon. CCMs are consequently more important in aquatic compared with terrestrial systems in terms of both species numbers and contribution to productivity. There is a large range of CCM mechanisms and carbon-extraction capabilities in aquatic photoautotrophs, particularly in fresh waters where the range of concentrations of  $\text{CO}_2$  and  $\text{HCO}_3^-$  is large. Marine photoautotrophs are more similar to one another in terms of ability to remove carbon and generally better able to extract carbon, probably because the benefit of using  $\text{HCO}_3^-$  is greater given its high concentration and because alternative reserves of  $\text{CO}_2$  in the sediment or atmosphere are largely unavailable, unlike for freshwater macrophytes. The variation in inorganic concentration and variability in CCM capability results in inorganic carbon being an ecological factor that controls ecological distribution. At low light, because of the energy cost associated with operating a CCM, and the lower benefits of increasing rates of photosynthesis, photoautotrophs from these environments often lack or have a low capacity to operate a CCM. Future work should focus on exploring the diversity of CCMs in the understudied seagrasses and the numerous phylogenetic groups of marine phytoplankton and exploit the biochemical and molecular tools and approaches that have been developed for microalgae to generate a mechanistic understanding of CCM mechanisms in larger aquatic photoautotrophs. Strengthening the links between ecology and CCMs will increase our understanding of the mechanisms underlying ecological success, aquatic productivity, and species distribution, and will place mechanistic studies in a clearer ecological context.

## Supplementary data

Supplementary data are available at *JXB* online.

Supplementary methods associated with [Figs 1–7](#).

Table S1. Ability of different species of aquatic photoautotroph to remove inorganic carbon (CT) during pH-drift experiments.

## Acknowledgements

Jens Hartmann is thanked for providing access to the GLORICH database. Guillermo Diaz-Pulido provided raw data from their paper in 2016. We thank John Beardall and John Raven for helpful comments on an earlier draft. SCM's research is funded by the UK Natural Environment Research Council. BG's research is supported by Centre National de la Recherche Scientifique, Aix-Marseille Univ, A\*Midex project (No. ANR-11-IDEX-0001-02), and Agence National de la Recherche (Signaux-BioNRJ, ANR-15-CE05-0021-03).

## References

- Adamec L.** 1997a. Mineral nutrition of carnivorous plants: a review. *Botanical Review* **63**, 273–299.
- Adamec L.** 1997b. Photosynthetic characteristics of the aquatic carnivorous plant *Aldrovanda vesiculosa*. *Aquatic Botany* **59**, 297–306.
- Adamec L.** 2009. Photosynthetic CO<sub>2</sub> affinity of the aquatic carnivorous plant *Utricularia australis* (Lentibulariaceae) and its investment in carnivory. *Ecological Research* **24**, 327–333.
- Ainsworth EA, Long SP.** 2005. What have we learned from 15 years of free-air CO<sub>2</sub> enrichment (FACE)? A meta-analytic review of the responses of photosynthesis, canopy properties and plant production to rising CO<sub>2</sub>. *New Phytologist* **165**, 351–371.
- Allen ED, Spence DHN.** 1981. The differential ability of aquatic plants to utilize the inorganic carbon supply in fresh waters. *New Phytologist* **87**, 269–283.
- Anderson NJ, Blomqvist P, Renberg I.** 1997. An experimental and palaeoecological study of algal responses to lake acidification and liming in three central Swedish lakes. *European Journal of Phycology* **32**, 35–48.
- Aulio K.** 1986. CAM-like photosynthesis in *Littorella uniflora* (L.) Aschers—the role of humidity. *Annals of Botany* **58**, 273–275.
- Axelsson L, Mercado J, Figueroa F.** 2000. Utilization of HCO<sub>3</sub><sup>-</sup> at high pH by the brown macroalga *Laminaria saccharina*. *European Journal of Phycology* **35**, 53–59.
- Axelsson L, Ryberg H, Beer S.** 1995. Two modes of bicarbonate utilization in the marine green macroalga *Ulva lactuca*. *Plant, Cell and Environment* **18**, 439–445.
- Baatrup-Pedersen A, Madsen TV.** 1999. Interdependence of CO<sub>2</sub> and inorganic nitrogen on crassulacean acid metabolism and efficiency of nitrogen use by *Littorella uniflora* (L.) Aschers. *Plant, Cell and Environment* **22**, 535–542.
- Baatrup-Pedersen A, Madsen TV, Riis T, Cavalli G.** 2013. Photosynthetic performance of submerged macrophytes from lowland stream and lake habitats with contrasting CO<sub>2</sub> availability. *New Phytologist* **198**, 1135–1142.
- Bain JT, Proctor MCF.** 1980. The requirement of aquatic bryophytes for free CO<sub>2</sub> as an inorganic carbon source, some experimental evidence. *New Phytologist* **86**, 393–400.
- Battarbee RW.** 1990. The causes of lake acidification, with special reference to the role of acid deposition. *Philosophical Transactions of the Royal Society B: Biological Sciences* **327**, 339–347.
- Beardall J.** 1991. Effects of photon flux density on the CO<sub>2</sub> concentrating mechanism of the cyanobacterium *Anabaena variabilis*. *Journal of Plankton Research* **13**, S133–S141.
- Beardall J, Giordano M.** 2002. Ecological implications of microalgal and cyanobacterial CO<sub>2</sub> concentrating mechanisms, and their regulation. *Functional Plant Biology* **29**, 335–347.
- Beer S, Shomerilan A, Waisel Y.** 1980. Carbon metabolism in seagrasses. 2. Patterns of photosynthetic CO<sub>2</sub> incorporation. *Journal of Experimental Botany* **31**, 1019–1026.
- Beer S, Wetzel RG.** 1981. Photosynthetic carbon metabolism in the submerged aquatic angiosperm *Scirpus subterminalis*. *Plant Science Letters* **21**, 199–207.
- Bhatti S, Colman B.** 2011. Evidence for the occurrence of photorespiration in synurophyte algae. *Photosynthesis Research* **109**, 251–256.
- Black MA, Maberly SC, Spence DHN.** 1981. Resistances to carbon-dioxide fixation in four submerged freshwater macrophytes. *New Phytologist* **89**, 557–568.
- Booth WA, Beardall J.** 1991. Effects of salinity on inorganic carbon utilization and carbonic anhydrase activity in the halotolerant alga *Dunaliella salina* (Chlorophyta). *Phycologia* **30**, 220–225.
- Borum J, Pedersen O, Kotula L, Fraser MW, Statton J, Colmer TD, Kendrick GA.** 2016. Photosynthetic response to globally increasing CO<sub>2</sub> of co-occurring temperate seagrass species. *Plant, Cell and Environment* **39**, 1240–1250.
- Bowes G.** 2011. Single-cell C<sub>4</sub> photosynthesis in aquatic plants. In: **Raghavendra AS, Sage RF**, eds. C<sub>4</sub> photosynthesis and related CO<sub>2</sub> concentrating mechanisms. Dordrecht: Springer Netherlands, 63–80.
- Bowes G, Rao SK, Estavillo GM, Reiskind JB.** 2002. C<sub>4</sub> mechanisms in aquatic angiosperms: comparisons with terrestrial C<sub>4</sub> systems. *Functional Plant Biology* **29**, 379–392.
- Briggs GE, Whittingham CP.** 1952. Factors affecting the rate of photosynthesis of *Chlorella* at low concentrations of carbon dioxide and in high illumination. *New Phytologist* **51**, 236–249.
- Casati P, Lara MV, Andreo CS.** 2000. Induction of a C(4)-like mechanism of CO(2) fixation in *Egeria densa*, a submersed aquatic species. *Plant Physiology* **123**, 1611–1622.
- Casper P, Maberly SC, Hall GH, Finlay BJ.** 2000. Fluxes of methane and carbon dioxide from a small productive lake to the atmosphere. *Biogeochemistry* **49**, 1–19.
- Clark DR, Flynn KJ.** 2000. The relationship between the dissolved inorganic carbon concentration and growth rate in marine phytoplankton. *Proceedings of the Royal Society B: Biological Sciences* **267**, 953–959.
- Clement R, Dimnet L, Maberly SC, Gontero B.** 2016. The nature of the CO<sub>2</sub>-concentrating mechanisms in a marine diatom, *Thalassiosira pseudonana*. *New Phytologist* **209**, 1417–1427.
- Clement R, Jensen E, Prioretti L, Maberly SC, Gontero B.** 2017a. Diversity of CO<sub>2</sub>-concentrating mechanisms and responses to CO<sub>2</sub> concentration in marine and freshwater diatoms. *Journal of Experimental Botany* **68**, 3925–3935.
- Clement R, Lignon S, Mansuelle P, Jensen E, Pophillat M, Lebrun R, Denis Y, Puppo C, Maberly SC, Gontero B.** 2017b. Responses of the marine diatom *Thalassiosira pseudonana* to changes in CO<sub>2</sub> concentration: a proteomic approach. *Scientific Reports* **7**, 42333.
- Cole JJ, Caraco NF, Kling GW, Kratz TK.** 1994. Carbon dioxide supersaturation in the surface waters of lakes. *Science* **265**, 1568–1570.
- Collins S, Sültemeyer D, Bell G.** 2006. Changes in C uptake in populations of *Chlamydomonas reinhardtii* selected at high CO<sub>2</sub>. *Plant, Cell and Environment* **29**, 1812–1819.
- Colman B, Huertas IE, Bhatti S, Dason JS.** 2002. The diversity of inorganic carbon acquisition mechanisms in eukaryotic microalgae. *Functional Plant Biology* **29**, 261–270.
- Cook CDK.** 1990. *Aquatic plant book*. The Hague: SPB Publishing.
- Cornwall CE, Hepburn CD, McGraw CM, Currie KI, Pilditch CA, Hunter KA, Boyd PW, Hurd CL.** 2013. Diurnal fluctuations in seawater pH influence the response of a calcifying macroalga to ocean acidification. *Proceedings of the Royal Society B: Biological Sciences* **280**, 20132201.
- Crawford KJ, Raven JA, Wheeler GL, Baxter EJ, Joint I.** 2011. The response of *Thalassiosira pseudonana* to long-term exposure to increased CO<sub>2</sub> and decreased pH. *PLoS One* **6**, e26695.
- Dason JS, Huertas IE, Colman B.** 2004. Source of inorganic carbon for photosynthesis in two marine dinoflagellates. *Journal of Phycology* **40**, 285–292.

- Delille B, Delille D, Fiala M, Prevost C, Frankignoulle M.** 2000. Seasonal changes of pCO<sub>2</sub> over a subantarctic *Macrocystis* kelp bed. *Polar Biology* **23**, 706–716.
- Demars BO, Trémolières M.** 2009. Aquatic macrophytes as bioindicators of carbon dioxide in groundwater fed rivers. *Science of the Total Environment* **407**, 4752–4763.
- Denfeld BA, Kortelainen P, Rantakari M, Sobek S, Weyhenmeyer GA.** 2016. Regional variability and drivers of below ice CO<sub>2</sub> in boreal and subarctic lakes. *Ecosystems* **19**, 461–476.
- Diaz MM, Maberly SC.** 2009. Carbon-concentrating mechanisms in acidophilic algae. *Phycologia* **48**, 77–85.
- Doney SC, Fabry VJ, Feely RA, Kleypas JA.** 2009. Ocean acidification: the other CO<sub>2</sub> problem. *Annual Review of Marine Science* **1**, 169–192.
- Du ZY, Wang QF.** 2014. Correlations of life form, pollination mode and sexual system in aquatic angiosperms. *PLoS One* **9**, e115653.
- Dulger E, Hussner A.** 2017. Differences in the growth and physiological response of eight *Myriophyllum* species to carbon dioxide depletion. *Aquatic Botany* **139**, 25–31.
- Evangelou VP, Zhang YL.** 1995. A review—pyrite oxidation mechanisms and acid-mine drainage prevention. *Critical Reviews in Environmental Science and Technology* **25**, 141–199.
- Fernández PA, Hurd CL, Roleda MY.** 2014. Bicarbonate uptake via an anion exchange protein is the main mechanism of inorganic carbon acquisition by the giant kelp *Macrocystis pyrifera* (Laminariales, Phaeophyceae) under variable pH. *Journal of Phycology* **50**, 998–1008.
- Field CB, Behrenfeld MJ, Randerson JT, Falkowski P.** 1998. Primary production of the biosphere: integrating terrestrial and oceanic components. *Science* **281**, 237–240.
- Galmes J, Flexas J, Keys AJ, Cifre J, Mitchell RAC, Madgwick PJ, Haslam RP, Medrano H, Parry MAJ.** 2005. Rubisco specificity factor tends to be larger in plant species from drier habitats and in species with persistent leaves. *Plant, Cell and Environment* **28**, 571–579.
- Giordano M, Beardall J, Raven JA.** 2005. CO<sub>2</sub> concentrating mechanisms in algae: mechanisms, environmental modulation, and evolution. *Annual Review of Plant Biology* **56**, 99–131.
- Grainger J.** 1947. Nutrition and flowering of water plants. *Journal of Ecology* **35**, 49–64.
- Gravot A, Dittami SM, Rousvoal S, Lukan R, Eggert A, Collén J, Boyen C, Bouchereau A, Tonon T.** 2010. Diurnal oscillations of metabolite abundances and gene analysis provide new insights into central metabolic processes of the brown alga *Ectocarpus siliculosus*. *New Phytologist* **188**, 98–110.
- Green WA.** 2010. The function of the aerenchyma in arborescent lycopsids: evidence of an unfamiliar metabolic strategy. *Proceedings of the Royal Society B: Biological Sciences* **277**, 2257–2267.
- Guiry MD.** 2012. How many species of algae are there? *Journal of Phycology* **48**, 1057–1063.
- Haimovich-Dayan M, Garfinkel N, Ewe D, Marcus Y, Gruber A, Wagner H, Kroth PG, Kaplan A.** 2013. The role of C<sub>4</sub> metabolism in the marine diatom *Phaeodactylum tricorutum*. *New Phytologist* **197**, 177–185.
- Harada H, Nakatsuma D, Ishida M, Matsuda Y.** 2005. Regulation of the expression of intracellular beta-carbonic anhydrase in response to CO<sub>2</sub> and light in the marine diatom *Phaeodactylum tricorutum*. *Plant Physiology* **139**, 1041–1050.
- Hartmann J, Lauerwald R, Moosdorf N.** 2014. A brief overview of the GLOBAL River Chemistry Database, GLORICH. In: Gaillardet J, ed. *Proceedia Earth and Planetary Science* **10**, 23–27.
- Hein M, Sand-Jensen K.** 1997. CO<sub>2</sub> increases oceanic primary production. *Nature* **388**, 526–527.
- Hofmann GE, Smith JE, Johnson KS, et al.** 2011. High-frequency dynamics of ocean pH: a multi-ecosystem comparison. *PLoS One* **6**, e28983.
- Hoins M, Eberlein T, Van de Waal DB, Slujs A, Reichart GJ, Rost B.** 2016. CO<sub>2</sub>-dependent carbon isotope fractionation in dinoflagellates relates to their inorganic carbon fluxes. *Journal of Experimental Marine Biology and Ecology* **481**, 9–14.
- Holaday AS, Bowes G.** 1980. C(4) acid metabolism and dark CO(2) fixation in a submersed aquatic macrophyte (*Hydrilla verticillata*). *Plant Physiology* **65**, 331–335.
- Holbrook GP, Beer S, Spencer WE, Reiskind JB, Davis JS, Bowes G.** 1988. Photosynthesis in marine macroalgae—evidence for carbon limitation. *Canadian Journal of Botany-Revue Canadienne De Botanique* **66**, 577–582.
- Hopkinson BM, Dupont CL, Allen AE, Morel FMM.** 2011. Efficiency of the CO<sub>2</sub>-concentrating mechanism of diatoms. *Proceedings of the National Academy of Sciences, USA* **108**, 3830–3837.
- Hopkinson BM, Meile C, Shen C.** 2013. Quantification of extracellular carbonic anhydrase activity in two marine diatoms and investigation of its role. *Plant Physiology* **162**, 1142–1152.
- Huertas IE, Espie GS, Colman B, Lubian LM.** 2000. Light-dependent bicarbonate uptake and CO<sub>2</sub> efflux in the marine microalga *Nannochloropsis gaditana*. *Planta* **211**, 43–49.
- Hutchinson GE.** 1970. The chemical ecology of three species of *Myriophyllum* (Angiospermae, Haloragaceae). *Limnology and Oceanography* **15**, 1–5.
- Ibelings BW, Maberly SC.** 1998. Photoinhibition and the availability of inorganic carbon restrict photosynthesis by surface blooms of cyanobacteria. *Limnology and Oceanography* **43**, 408–419.
- Iversen J.** 1929. Studien uber die pH- Verhältnisse danischer Gewässer und ihren Einfluss auf die Hydrophyten-Vegetation. *Botanisk Tidsskrift* **40**, 277–326.
- Janauer GA, Englmaier P.** 1986. The effects of emersion on soluble carbohydrate accumulations in *Hippuris vulgaris* L. *Aquatic Botany* **24**, 241–248.
- Jansson M, Karlsson J, Jonsson A.** 2012. Carbon dioxide supersaturation promotes primary production in lakes. *Ecology Letters* **15**, 527–532.
- Jarvie HP, King SM, Neal C.** 2017. Inorganic carbon dominates total dissolved carbon concentrations and fluxes in British rivers: application of the THINCARB model—thermodynamic modelling of inorganic carbon in freshwaters. *Science of the Total Environment* **575**, 496–512.
- Johnston AM, Raven JA.** 1987. The C<sub>4</sub>-like characteristics of the intertidal macroalga *Ascophyllum nodosum* (L.) Le Jolis (Fucales, Phaeophyta). *Phycologia* **26**, 159–166.
- Keeley JE.** 1981. *Isoetes howellii* a submerged aquatic CAM plant. *American Journal of Botany* **68**, 420–424.
- Keeley JE.** 1998. CAM photosynthesis in submerged aquatic plants. *Botanical Review* **64**, 121–175.
- Keeley JE.** 2014. Aquatic CAM photosynthesis: a brief history of its discovery. *Aquatic Botany* **118**, 38–44.
- Klavens SK, Maberly SC.** 2010. Effect of light and CO<sub>2</sub> on inorganic carbon uptake in the invasive aquatic CAM-plant *Crassula helmsii*. *Functional Plant Biology* **37**, 737–747.
- Klavens SK, Madsen TV, Maberly SC.** 2011. Crassulacean acid metabolism in the context of other carbon-concentrating mechanisms in freshwater plants: a review. *Photosynthesis Research* **109**, 269–279.
- Koch M, Bowes G, Ross C, Zhang XH.** 2013. Climate change and ocean acidification effects on seagrasses and marine macroalgae. *Global Change Biology* **19**, 103–132.
- Kottmeier DM, Rokitta SD, Rost B.** 2016. Acidification, not carbonation, is the major regulator of carbon fluxes in the coccolithophore *Emiliania huxleyi*. *New Phytologist* **211**, 126–137.
- Kranz SA, Young JN, Hopkinson BM, Goldman JA, Tortell PD, Morel FM.** 2015. Low temperature reduces the energetic requirement for the CO<sub>2</sub> concentrating mechanism in diatoms. *New Phytologist* **205**, 192–201.
- Krause-Jensen D, Duarte CM.** 2016. Substantial role of macroalgae in marine carbon sequestration. *Nature Geoscience* **9**, 737–742.
- Krause-Jensen D, Marbà N, Sanz-Martin M, Hendriks IE, Thyrring J, Carstensen J, Sejr MK, Duarte CM.** 2016. Long photoperiods sustain high pH in Arctic kelp forests. *Science Advances* **2**, e1501938.
- Kreft H, Jetz W.** 2007. Global patterns and determinants of vascular plant diversity. *Proceedings of the National Academy of Sciences, USA* **104**, 5925–5930.
- Lachmann SC, Maberly SC, Spijkerman E.** 2016. Ecophysiology matters: linking inorganic carbon acquisition to ecological preference in four species of microalgae (Chlorophyceae). *Journal of Phycology* **52**, 1051–1063.
- Laing WA, Ogren WL, Hageman RH.** 1974. Regulation of soybean net photosynthetic CO<sub>2</sub> fixation by the interaction of CO<sub>2</sub>, O<sub>2</sub>, and ribulose 1,5-diphosphate carboxylase. *Plant Physiology* **54**, 678–685.

- Lane TW, Morel FMM.** 2000. A biological function for cadmium in marine diatoms. *Proceedings of the National Academy of Sciences, USA* **97**, 4627–4631.
- Larkum AW, Davey P, Kuo J, Ralph P, Raven JA.** 2017. Carbon-concentrating mechanisms in seagrasses? *Journal of Experimental Botany* **68**, 3773–3784.
- Lauerwald R, Laruelle GG, Hartmann J, Ciais P, Regnier PAG.** 2015. Spatial patterns in CO<sub>2</sub> evasion from the global river network. *Global Biogeochemical Cycles* **29**, 534–554.
- Les DH, Tippery NP.** 2013. In time and with water... the systematics of alismatid monocotyledons. In: Wilkin P, Mayo SJ, eds. *Early events in monocot evolution*. Cambridge: Cambridge University Press, 118–164.
- Lloyd J, Farquhar GD.** 1996. The CO<sub>2</sub> dependence of photosynthesis, plant growth responses to elevated atmospheric CO<sub>2</sub> concentrations and their interaction with soil nutrient status .1. General principles and forest ecosystems. *Functional Ecology* **10**, 4–32.
- Loczy S, Carignan R, Planas D.** 1983. The role of roots in carbon uptake by the submersed macrophytes *Myriophyllum spicatum*, *Vallisneria spiralis*, and *Heteranthera dubia*. *Hydrobiologia* **98**, 3–7.
- Lucas WJ, Smith FA.** 1973. Formation of alkaline and acid regions at surface of *Chara corallina* cells. *Journal of Experimental Botany* **24**, 1–14.
- Maberly SC.** 1985a. Photosynthesis by *Fontinalis antipyretica* 1. Interaction between photon irradiance, concentration of carbon dioxide and temperature. *New Phytologist* **100**, 127–140.
- Maberly SC.** 1985b. Photosynthesis by *Fontinalis antipyretica* 2. Assessment of environmental factors limiting photosynthesis and production. *New Phytologist* **100**, 141–155.
- Maberly SC.** 1990. Exogenous sources of inorganic carbon for photosynthesis by marine macroalgae. *Journal of Phycology* **26**, 439–449.
- Maberly SC.** 1992. Carbonate ions appear to neither inhibit nor stimulate use of bicarbonate ions in photosynthesis by *Ulva lactuca*. *Plant, Cell and Environment* **15**, 255–260.
- Maberly SC.** 1996. Diel, episodic and seasonal changes in pH and concentrations of inorganic carbon in a productive lake. *Freshwater Biology* **35**, 579–598.
- Maberly SC.** 2014. The fitness of the environments of air and water for photosynthesis, growth, reproduction and dispersal of photoautotrophs: an evolutionary and biogeochemical perspective. *Aquatic Botany* **118**, 4–13.
- Maberly SC, Ball LA, Raven JA, Sültemeyer D.** 2009. Inorganic carbon acquisition by chrysophytes(1). *Journal of Phycology* **45**, 1052–1061.
- Maberly SC, Barker PA, Stott AW, De Ville MM.** 2013. Catchment productivity controls CO<sub>2</sub> emissions from lakes. *Nature Climate Change* **3**, 391–394.
- Maberly SC, Berthelot SA, Stott AW, Gontero B.** 2015. Adaptation by macrophytes to inorganic carbon down a river with naturally variable concentrations of CO<sub>2</sub>. *Journal of Plant Physiology* **172**, 120–127.
- Maberly SC, Madsen TV.** 1998. Affinity for CO<sub>2</sub> in relation to the ability of freshwater macrophytes to use HCO<sub>3</sub><sup>-</sup>. *Functional Ecology* **12**, 99–106.
- Maberly SC, Madsen TV.** 2002a. Freshwater angiosperm carbon concentrating mechanisms: processes and patterns. *Functional Plant Biology* **29**, 393–405.
- Maberly SC, Madsen TV.** 2002b. Use of bicarbonate ions as a source of carbon in photosynthesis by *Callitriche hermaphrodita*. *Aquatic Botany* **73**, 1–7.
- Madsen TV.** 1987a. The effect of different growth conditions on dark and light carbon assimilation in *Littorella uniflora*. *Physiologia Plantarum* **70**, 183–188.
- Madsen TV.** 1987b. Interactions between internal and external CO<sub>2</sub> pools in the photosynthesis of the aquatic CAM plants *Littorella uniflora* (L) Aschers and *Isoetes lacustris* L. *New Phytologist* **106**, 35–50.
- Madsen TV, Breinholt M.** 1995. Effects of air contact on growth, inorganic carbon sources, and nitrogen uptake by an amphibious freshwater macrophyte. *Plant Physiology* **107**, 149–154.
- Madsen TV, Maberly SC.** 1991. Diurnal variation in light and carbon limitation of photosynthesis by two species of submerged freshwater macrophyte with a differential ability to use bicarbonate. *Freshwater Biology* **26**, 175–187.
- Madsen TV, Maberly SC.** 2003. High internal resistance to CO<sub>2</sub> uptake by submerged macrophytes that use HCO<sub>3</sub><sup>-</sup>: measurements in air, nitrogen and helium. *Photosynthesis Research* **77**, 183–190.
- Madsen TV, Maberly SC, Bowes G.** 1996. Photosynthetic acclimation of submersed angiosperms to CO<sub>2</sub> and HCO<sub>3</sub><sup>-</sup>. *Aquatic Botany* **53**, 15–30.
- Madsen TV, Olesen B, Bagger J.** 2002. Carbon acquisition and carbon dynamics by aquatic isoetids. *Aquatic Botany* **73**, 351–371.
- Magnin NC, Cooley BA, Reiskind JB, Bowes G.** 1997. Regulation and localization of key enzymes during the induction of Kranz-less, C4-type photosynthesis in *Hydrilla verticillata*. *Plant Physiology* **115**, 1681–1689.
- Mann DG, Vanormelingen P.** 2013. An inordinate fondness? The number, distributions, and origins of diatom species. *Journal of Eukaryotic Microbiology* **60**, 414–420.
- Mass T, Genin A, Shavit U, Grinstein M, Tchernov D.** 2010. Flow enhances photosynthesis in marine benthic autotrophs by increasing the efflux of oxygen from the organism to the water. *Proceedings of the National Academy of Sciences, USA* **107**, 2527–2531.
- Matsuda Y, Nakajima K, Tachibana M.** 2011. Recent progresses on the genetic basis of the regulation of CO<sub>2</sub> acquisition systems in response to CO<sub>2</sub> concentration. *Photosynthesis Research* **109**, 191–203.
- Meybeck M.** 2003. Global occurrence of major elements in rivers. In: **Driver JI**, ed. *Treatise on geochemistry*, Vol. **5**. Amsterdam: Elsevier Science Publishing, 207–223.
- Middelboe AL, Hansen PJ.** 2007. High pH in shallow-water macroalgal habitats. *Marine Ecology Progress Series* **338**, 107–117.
- Middelboe AL, Markager S.** 1997. Depth limits and minimum light requirements of freshwater macrophytes. *Freshwater Biology* **37**, 553–568.
- Minge MA, Shalchian-Tabrizi K, Tørresen OK, Takishita K, Probert I, Inagaki Y, Klaveness D, Jakobsen KS.** 2010. A phylogenetic mosaic plastid proteome and unusual plastid-targeting signals in the green-colored dinoflagellate *Lepidodinium chlorophorum*. *BMC Evolutionary Biology* **10**, 191.
- Moroney JV, Ma Y, Frey WD, Fusilier KA, Pham TT, Simms TA, DiMario RJ, Yang J, Mukherjee B.** 2011. The carbonic anhydrase isoforms of *Chlamydomonas reinhardtii*: intracellular location, expression, and physiological roles. *Photosynthesis Research* **109**, 133–149.
- Moroney JV, Somanchi A.** 1999. How do algae concentrate CO<sub>2</sub> to increase the efficiency of photosynthetic carbon fixation? *Plant Physiology* **119**, 9–16.
- Morse D, Salois P, Markovic P, Hastings JW.** 1995. A nuclear-encoded Form II Rubisco in dinoflagellates. *Science* **268**, 1622–1624.
- Murphy LR, Barroca J, Franceschi VR, Lee R, Roalson EH, Edwards GE, Ku MSB.** 2007. Diversity and plasticity of C-4 photosynthesis in *Eleocharis* (Cyperaceae). *Functional Plant Biology* **34**, 571–580.
- Murru M, Sandgren CD.** 2004. Habitat matters for inorganic carbon acquisition in 38 species of red macroalgae (Rhodophyta) from Puget Sound, Washington, USA. *Journal of Phycology* **40**, 837–845.
- Nakajima K, Tanaka A, Matsuda Y.** 2013. SLC4 family transporters in a marine diatom directly pump bicarbonate from seawater. *Proceedings of the National Academy of Sciences, USA* **110**, 1767–1772.
- Newman JR, Raven JA.** 1995. Photosynthetic carbon assimilation by *Crassula helmsii*. *Oecologia* **101**, 494–499.
- Osborne CP, Freckleton RP.** 2009. Ecological selection pressures for C4 photosynthesis in the grasses. *Proceedings of the Royal Society B: Biological Sciences* **276**, 1753–1760.
- Pedersen O, Pulido C, Rich SM, Colmer TD.** 2011. *In situ* O<sub>2</sub> dynamics in submerged *Isoetes australis*: varied leaf gas permeability influences underwater photosynthesis and internal O<sub>2</sub>. *Journal of Experimental Botany* **62**, 4691–4700.
- Pedrozo F, Kelly L, Diaz M, Temporetti P, Baffico G, Kringel R, Friese K, Mages M, Geller W, Woelfl S.** 2001. First results on the water chemistry, algae and trophic status of an Andean acidic lake system of volcanic origin in Patagonia (Lake Caviahue). *Hydrobiologia* **452**, 129–137.
- Penuelas J.** 1985. HCO<sub>3</sub><sup>-</sup> as an exogenous carbon source for aquatic bryophytes *Fontinalis antipyretica* and *Fissidens grandifrons*. *Journal of Experimental Botany* **36**, 441–448.
- Philbrick CT, Les DH.** 2000. Phylogenetic studies in *Callitriche*: implications for interpretation of ecological, karyological and pollination system evolution. *Aquatic Botany* **68**, 123–141.



- Price GD.** 2011. Inorganic carbon transporters of the cyanobacterial CO<sub>2</sub> concentrating mechanism. *Photosynthesis Research* **109**, 47–57.
- Price GD, Badger MR, Woodger FJ, Long BM.** 2008. Advances in understanding the cyanobacterial CO<sub>2</sub>-concentrating-mechanism (CCM): functional components, Ci transporters, diversity, genetic regulation and prospects for engineering into plants. *Journal of Experimental Botany* **59**, 1441–1461.
- Prins HBA, Deguia MB.** 1986. Carbon source of the water soldier, *Stratiotes aloides* L. *Aquatic Botany* **26**, 225–234.
- Prins HBA, Elzenga JTM.** 1989. Bicarbonate utilization: function and mechanism. *Aquatic Botany* **34**, 59–83.
- Prins HB, Snel JF, Helder RJ, Zanstra PE.** 1980. Photosynthetic HCO<sub>3</sub> utilization and OH excretion in aquatic angiosperms: light-induced pH changes at the leaf surface. *Plant Physiology* **66**, 818–822.
- Prins HBA, Snel JFH, Zanstra PE, Helder RJ.** 1982. The mechanisms of bicarbonate assimilation by the polar leaves of *Potamogeton* and *Elodea*: CO<sub>2</sub> concentrations at the leaf surface. *Plant, Cell and Environment* **5**, 207–214.
- Raven JA.** 1970. Exogenous inorganic carbon sources in plant photosynthesis. *Biological Reviews of the Cambridge Philosophical Society* **45**, 167–220.
- Raven JA.** 1995. Photosynthetic and non-photosynthetic roles of carbonic anhydrase in algae and cyanobacteria. *Phycologia* **34**, 93–101.
- Raven JA, Ball LA, Beardall J, Giordano M, Maberly SC.** 2005. Algae lacking carbon-concentrating mechanisms. *Canadian Journal of Botany* **83**, 879–890.
- Raven JA, Beardall J.** 1981. Carbon dioxide as the exogenous inorganic carbon source for *Batrachospermum* and *Lemanea*. *British Phycological Journal* **16**, 165–175.
- Raven JA, Beardall J.** 2014. CO<sub>2</sub> concentrating mechanisms and environmental change. *Aquatic Botany* **118**, 24–37.
- Raven JA, Beardall J.** 2016. The ins and outs of CO<sub>2</sub>. *Journal of Experimental Botany* **67**, 1–13.
- Raven JA, Beardall J, Giordano M.** 2014. Energy costs of carbon dioxide concentrating mechanisms in aquatic organisms. *Photosynthesis Research* **121**, 111–124.
- Raven JA, Giordano M.** 2017. Acquisition and metabolism of carbon in the Ochrophyta other than diatoms. *Philosophical Transactions of the Royal Society B: Biological Sciences* (in press).
- Raven JA, Hurd CL.** 2012. Ecophysiology of photosynthesis in macroalgae. *Photosynthesis Research* **113**, 105–125.
- Raven JA, Johnston AM.** 1991. Mechanisms of inorganic carbon acquisition in marine phytoplankton and their implication for the use of other resources. *Limnology and Oceanography* **36**, 1701–1714.
- Raven JA, Lucas WJ.** 1985. Energy cost of carbon acquisition. In: Lucas WJ, Berry JA, eds. *Inorganic carbon uptake by aquatic photosynthetic organisms*. Rockville, MD: American Society of Plant Physiologists, 305–324.
- Raymond PA, Hartmann J, Lauerwald R, et al.** 2013. Global carbon dioxide emissions from inland waters. *Nature* **503**, 355–359.
- Reinfelder JR.** 2011. Carbon concentrating mechanisms in eukaryotic marine phytoplankton. *Annual Review of Marine Science* **3**, 291–315.
- Reinfelder JR.** 2012. Carbon dioxide regulation of nitrogen and phosphorus in four species of marine phytoplankton. *Marine Ecology Progress Series* **466**, 57–67.
- Reinfelder JR, Kraepiel AM, Morel FM.** 2000. Unicellular C<sub>4</sub> photosynthesis in a marine diatom. *Nature* **407**, 996–999.
- Reiskind JB, Berg RH, Salvucci ME, Bowes G.** 1989. Immunogold localization of primary carboxylases in leaves of aquatic and a C<sub>3</sub>–C<sub>4</sub> intermediate species. *Plant Science* **61**, 43–52.
- Reiskind JB, Bowes G.** 1991. The role of phosphoenolpyruvate carboxykinase in a marine macroalga with C<sub>4</sub>-like photosynthetic characteristics. *Proceedings of the National Academy of Sciences, USA* **88**, 2883–2887.
- Reiskind JB, Madsen TV, Van Ginkel LC, Bowes G.** 1997. Evidence that inducible C<sub>4</sub> type photosynthesis is a chloroplastic CO<sub>2</sub> concentrating mechanism in *Hydrilla*, a submersed monocot. *Plant, Cell and Environment* **20**, 211–220.
- Reiskind JB, Seamon PT, Bowes G.** 1988. Alternative methods of photosynthetic carbon assimilation in marine macroalgae. *Plant Physiology* **87**, 686–692.
- Riebesell U, Wolfgladrow DA, Smetacek V.** 1993. Carbon dioxide limitation of marine phytoplankton growth rates. *Nature* **361**, 249–251.
- Robe WE, Griffiths H.** 1990. Photosynthesis of *Littorella uniflora* grown under two PAR regimes: C<sub>3</sub> and CAM gas exchange and the regulation of internal CO<sub>2</sub> and O<sub>2</sub> concentrations. *Oecologia* **85**, 128–136.
- Robe WE, Griffiths H.** 2000. Physiological and photosynthetic plasticity in the amphibious, freshwater plant, *Littorella uniflora*, during the transition from aquatic to dry terrestrial environments. *Plant, Cell and Environment* **23**, 1041–1054.
- Rost B, Riebesell U, Burkhardt S, Sultemeyer D.** 2003. Carbon acquisition of bloom-forming marine phytoplankton. *Limnology and Oceanography* **48**, 55–67.
- Sage RF.** 2002. C<sub>4</sub> photosynthesis in terrestrial plants does not require Kranz anatomy. *Trends in Plant Science* **7**, 283–285.
- Sage RF.** 2016. A portrait of the C<sub>4</sub> photosynthetic family on the 50th anniversary of its discovery: species number, evolutionary lineages, and Hall of Fame. *Journal of Experimental Botany* **67**, 4039–4056.
- Sage RF, Khoshravesh R.** 2016. Passive CO<sub>2</sub> concentration in higher plants. *Current Opinion in Plant Biology* **31**, 58–65.
- Sand-Jensen K, Frost-Christensen H.** 1998. Photosynthesis of amphibious and obligately submerged plants in CO<sub>2</sub>-rich lowland streams. *Oecologia* **117**, 31–39.
- Sand-Jensen K, Gordon DM.** 1986. Variable HCO<sub>3</sub><sup>-</sup> affinity of *Elodea canadensis* Michaux in response to different HCO<sub>3</sub><sup>-</sup> and CO<sub>2</sub> concentrations during growth. *Oecologia* **70**, 426–432.
- Sandrini G, Ji X, Verspagen JMH, Tann RP, Slot PC, Luimstra VM, Schuurmans JM, Matthijs HCP, Huisman J.** 2016. Rapid adaptation of harmful cyanobacteria to rising CO<sub>2</sub>. *Proceedings of the National Academy of Sciences, USA* **113**, 9315–9320.
- Sandrini G, Matthijs HC, Verspagen JM, Muyzer G, Huisman J.** 2014. Genetic diversity of inorganic carbon uptake systems causes variation in CO<sub>2</sub> response of the cyanobacterium *Microcystis*. *ISME Journal* **8**, 589–600.
- Saxby-Rouen KJ, Leadbeater BSC, Reynolds CS.** 1998. The relationship between the growth of *Synura petersenii* (Synurophyceae) and components of the dissolved inorganic carbon system. *Phycologia* **37**, 467–477.
- Scott KM, Henn-Sax M, Harmer TL, Longo DL, Frame CH, Cavanaugh CM.** 2007. Kinetic isotope effect and biochemical characterization of form IA RubisCO from the marine cyanobacterium *Prochlorococcus marinus* MIT9313. *Limnology and Oceanography* **52**, 2199–2204.
- Sculthorpe CD.** 1967. *The biology of aquatic vascular plants*. London: Edward Arnold Ltd.
- Shao H, Gontero B, Maberly SC, Jiang HS, Cao Y, Li W, Huang WM.** 2017. Responses of *Ottelia alismoides*, an aquatic plant with three CCMs, to variable CO<sub>2</sub> and light. *Journal of Experimental Botany* **68**, 3985–3995.
- Shapiro J.** 1997. The role of carbon dioxide in the initiation and maintenance of blue-green dominance in lakes. *Freshwater Biology* **37**, 307–323.
- Silvera K, Neubig KM, Whitten WM, Williams NH, Winter K, Cushman JC.** 2010. Evolution along the crassulacean acid metabolism continuum. *Functional Plant Biology* **37**, 995–1010.
- Sobek S, Tranvik LJ, Prairie YT, Kortelainen P, Cole JJ.** 2007. Patterns and regulation of dissolved organic carbon: an analysis of 7500 widely distributed lakes. *Limnology and Oceanography* **52**, 1208–1219.
- Spence DHN.** 1967. Factors controlling the distribution of freshwater macrophytes with particular reference to the lochs of Scotland. *Journal of Ecology* **55**, 147–170.
- Spence DHN, Maberly SC.** 1985. Occurrence and ecological importance of HCO<sub>3</sub><sup>-</sup> use among aquatic higher plants. In: Lucas WJ, Berry JA, eds. *Inorganic carbon uptake by aquatic photosynthetic organisms*. Rockville, MD: American Society of Plant Physiologists, 125–143.
- Spijkerman E, Maberly SC, Coesel PFM.** 2005. Carbon acquisition mechanisms by planktonic desmids and their link to ecological distribution.

Canadian Journal of Botany-Revue Canadienne De Botanique **83**, 850–858.

**Stemann Nielsen E.** 1947. Photosynthesis of aquatic plants with special reference to the carbon sources. Dansk Botanisk Arkiv **12**, 1–71.

**Stepien CC.** 2015. Impacts of geography, taxonomy and functional group on inorganic carbon use patterns in marine macrophytes. Journal of Ecology **103**, 1372–1383.

**Stepien CC, Pfister CA, Wootton JT.** 2016. Functional traits for carbon access in macrophytes. PLoS One **11**, e0159062.

**Stets EG, Striegl RG, Aiken GR, Rosenberry DO, Winter TC.** 2009. Hydrologic support of carbon dioxide flux revealed by whole-lake carbon budgets. Journal of Geophysical Research-Biogeosciences **114**.

**Still CJ, Berry JA, Collatz GJ, DeFries RS.** 2003. Global distribution of C<sub>3</sub> and C<sub>4</sub> vegetation: carbon cycle implications. Global Biogeochemical Cycles **17**, 1006.

**Stumm W, Morgan JJ.** 2012. Aquatic chemistry: chemical equilibria and rates in natural waters. New York: John Wiley & Sons.

**Tabita FR, Satagopan S, Hanson TE, Kreel NE, Scott SS.** 2008. Distinct form I, II, III, and IV Rubisco proteins from the three kingdoms of life provide clues about Rubisco evolution and structure/function relationships. Journal of Experimental Botany **59**, 1515–1524.

**Talling JF.** 1976. Depletion of carbon dioxide from lake water by phytoplankton. Journal of Ecology **64**, 79–121.

**Talling JF.** 1985. Inorganic carbon reserves of natural waters and ecophysiological consequences of their photosynthetic depletion: microalgae. In: Lucas WJ, Berry JA, eds. Inorganic carbon uptake by aquatic photosynthetic organisms. Rockville, MD: American Society of Plant Physiologists, 403–435.

**Tamura M, Shimada S, Horiguchi T.** 2005. *Galeidinium rugatum* gen. et sp. nov. (Dinophyceae), a new coccoid dinoflagellate with a diatom endosymbiont. Journal of Phycology **41**, 658–671.

**Tanaka R, Kikutani S, Mahardika A, Matsuda Y.** 2014. Localization of enzymes relating to C<sub>4</sub> organic acid metabolisms in the marine diatom, *Thalassiosira pseudonana*. Photosynthesis Research **121**, 251–263.

**Tortell PD.** 2000. Evolutionary and ecological perspectives on carbon acquisition in phytoplankton. Limnology and Oceanography **45**, 744–750.

**Trimborn S, Wolf-Gladrow D, Richter K-U, Rost B.** 2009. The effect of pCO<sub>2</sub> on carbon acquisition and intracellular assimilation in four marine diatoms. Journal of Experimental Marine Biology and Ecology **376**, 26–36.

**Ueno O.** 1998. Induction of kranz anatomy and C<sub>4</sub>-like biochemical characteristics in a submerged amphibious plant by abscisic acid. The Plant Cell **10**, 571–584.

**Van TK, Haller WT, Bowes G.** 1976. Comparison of the photosynthetic characteristics of three submersed aquatic plants. Plant Physiology **58**, 761–768.

**van der Heijden LH, Kamenos NA.** 2015. Reviews and syntheses: calculating the global contribution of coralline algae to total carbon burial. Biogeosciences **12**, 6429–6441.

**Verberk WC, Bilton DT, Calosi P, Spicer JI.** 2011. Oxygen supply in aquatic ectotherms: partial pressure and solubility together explain biodiversity and size patterns. Ecology **92**, 1565–1572.

**Vestergaard O, Sand-Jensen K.** 2000. Alkalinity and trophic state regulate aquatic plant distribution in Danish lakes. Aquatic Botany **67**, 85–107.

**Vighi M, Chiaudani G.** 1985. A simple method to estimate lake phosphorus concentrations resulting from natural, background, loadings. Water Research **19**, 987–991.

**Villarreal JC, Renner SS.** 2012. Hornwort pyrenoids, carbon-concentrating structures, evolved and were lost at least five times during the last 100 million years. Proceedings of the National Academy of Sciences, USA **109**, 18873–18878.

**Vogel S.** 1994. Life in moving fluids: the physical biology of flow. Princeton, NJ: Princeton University Press.

**Voznesenskaya EV, Franceschi VR, Kiirats O, Freitag H, Edwards GE.** 2001. Kranz anatomy is not essential for terrestrial C<sub>4</sub> plant photosynthesis. Nature **414**, 543–546.

**Wang Y, Duanmu D, Spalding MH.** 2011. Carbon dioxide concentrating mechanism in *Chlamydomonas reinhardtii*: inorganic carbon transport and CO<sub>2</sub> recapture. Photosynthesis Research **109**, 115–122.

**Winkel A, Borum J.** 2009. Use of sediment CO<sub>2</sub> by submersed rooted plants. Annals of Botany **103**, 1015–1023.

**Wium-Andersen S.** 1971. Photosynthetic uptake of free CO<sub>2</sub> by roots of *Lobelia dortmanna*. Physiologia Plantarum **25**, 245–248.

**Yamamoto Y, Shiah FK.** 2012. Factors related to the dominance of *Cylindrospermopsis raciborskii* (Cyanobacteria) in a shallow pond in northern Taiwan(1). Journal of Phycology **48**, 984–991.

**Yang J, Pan YF, Bowler C, Zhang LX, Hu HH.** 2016. Knockdown of phosphoenolpyruvate carboxykinase increases carbon flux to lipid synthesis in *Phaeodactylum tricorutum*. Algal Research-Biomass Biofuels and Bioproducts **15**, 50–58.

**Yang T, Liu X.** 2015. Comparing photosynthetic characteristics of Isoetes sinensis Palmer under submerged and terrestrial conditions. Scientific Reports **5**, 17783.

**Yin L, Li W, Madsen TV, Maberly SC, Bowes G.** 2017. Photosynthetic inorganic carbon acquisition in 30 freshwater macrophytes. Aquatic Botany (in press).

**Young JN, Goldman JA, Kranz SA, Tortell PD, Morel FM.** 2015. Slow carboxylation of Rubisco constrains the rate of carbon fixation during Antarctic phytoplankton blooms. New Phytologist **205**, 172–181.

**Young JN, Heureux AM, Sharwood RE, Rickaby RE, Morel FM, Whitney SM.** 2016. Large variation in the Rubisco kinetics of diatoms reveals diversity among their carbon-concentrating mechanisms. Journal of Experimental Botany **67**, 3445–3456.

**Zahonova K, Fussy Z, Obornik M, Elias M, Yurchenko V.** 2016. RuBisCO in non-photosynthetic alga *Euglena longa*: divergent features, transcriptomic analysis and regulation of complex formation. PLoS One **11**.

**Zeebe RE.** 2011. On the molecular diffusion coefficients of dissolved CO<sub>2</sub>, HCO<sub>3</sub><sup>-</sup>, and CO<sub>3</sub><sup>2-</sup> and their dependence on isotopic mass. Geochimica et Cosmochimica Acta **75**, 2483–2498.

**Zhang Y, Yin L, Jiang HS, Li W, Gontero B, Maberly SC.** 2014. Biochemical and biophysical CO<sub>2</sub> concentrating mechanisms in two species of freshwater macrophyte within the genus *Ottelia* (Hydrocharitaceae). Photosynthesis Research **121**, 285–297.
